1  
2  
3  
4  
5  
6  
7  
8  
9  
10  
11  
12  
13  
14  
15  
16  
17  
18  
19  
20  
21  
22

**Phosphorylation triggers presynaptic phase separation of Liprin- $\alpha$ 3 to control active zone structure**

Javier Emperador-Melero<sup>1</sup>, Man Yan Wong<sup>1</sup>, Shan Shan H. Wang<sup>1</sup>, Giovanni de Nola<sup>1</sup>, Tom Kirchhausen<sup>2</sup>, and Pascal S. Kaeser<sup>1,#</sup>

1. Department of Neurobiology, Harvard Medical School, Boston, MA 02115

2. Departments of Cell Biology and Pediatrics, Harvard Medical School and Program in Cellular and Molecular Medicine, Boston Children’s Hospital, Boston, MA 02115

#correspondence and lead contact: [kaeser@hms.harvard.edu](mailto:kaeser@hms.harvard.edu)

23 **Abstract**

24

25 Liquid-liquid phase separation enables the assembly of membrane-less subcellular  
26 compartments, but testing its biological functions has been difficult. The presynaptic active  
27 zone, protein machinery in nerve terminals that defines sites for neurotransmitter release, may  
28 be organized through phase separation. Here, we discover that the active zone protein Liprin- $\alpha$ 3  
29 rapidly and reversibly undergoes phase separation upon phosphorylation by PKC at a single  
30 site. RIM and Munc13 are co-recruited to membrane-attached condensates, and phospho-  
31 specific antibodies establish Liprin- $\alpha$ 3 phosphorylation in vivo. At synapses of newly generated  
32 Liprin- $\alpha$ 2/ $\alpha$ 3 double knockout mice, RIM, Munc13 and the pool of releasable vesicles were  
33 reduced. Re-expression of Liprin- $\alpha$ 3 restored these defects, but mutating the Liprin- $\alpha$ 3  
34 phosphorylation site to abolish phase condensation prevented rescue. Finally, PKC activation  
35 acutely increased RIM, Munc13 and neurotransmitter release, which depended on the presence  
36 of phosphorylatable Liprin- $\alpha$ 3. We conclude that Liprin- $\alpha$ 3 phosphorylation rapidly triggers  
37 presynaptic phase separation to modulate active zone structure and function.

38

## 39 Introduction

40

41 Membrane-free subcellular compartments form through liquid-liquid phase separation, a  
42 process in which multivalent, low affinity interactions enable de-mixing of proteins into liquid  
43 condensates<sup>1-3</sup>. These condensates maintain high local protein concentrations and create a  
44 plastic environment that enables molecular re-arrangement and exchange with the environment.  
45 Compelling work has established that protein complexes for many processes, ranging from  
46 gene transcription to neurodegeneration, can be organized as phase condensates, but it has  
47 remained challenging to establish which condensates form in vivo and to determine how phase  
48 separation controls intracellular functions.

49

50 This is particularly true for synaptic transmission. Within a synapse, neurotransmitter release is  
51 restricted to specialized presynaptic structures called active zones<sup>4,5</sup>. These membrane-  
52 attached, dense scaffolds are formed by the multidomain proteins RIM, Munc13, RIM-BP,  
53 Piccolo/Bassoon, ELKS and Liprin- $\alpha$ , and are essential for the sub-millisecond precision of  
54 synaptic vesicle exocytosis. While several mechanisms of these proteins in release are  
55 established, it remains largely unknown how these dense scaffolds assemble, and how they  
56 remain dynamic to maintain the high spatiotemporal demands of presynaptic vesicle traffic.  
57 Purified RIM1 and RIM-BP2 form liquid condensates in vitro, indicating that active zones may  
58 assemble following phase transition principles<sup>6</sup>, and other subsynaptic compartments may also  
59 be organized by phase separation<sup>7,8</sup>. Whether phase separation occurs at synapses in vivo,  
60 however, remains debated, and whether it is important for controlling hallmark properties of  
61 synaptic release, for example its speed and plasticity, is unclear.

62

63 Liprin- $\alpha$  proteins have received particular attention as assembly molecules because they control  
64 presynaptic structure of invertebrate synapses<sup>9-12</sup>. They contain N-terminal coiled-coils with

65 Liprin- $\alpha$  homology (LH) regions and three C-terminal SAM domains<sup>5,10,13,14</sup>. Mammals have four  
66 genes (*Ppfia1-Ppfia4*) that encode Liprin- $\alpha$ 1 to Liprin- $\alpha$ 4<sup>13</sup>, of which only Liprin- $\alpha$ 2 and Liprin- $\alpha$ 3  
67 are strongly expressed in the brain and co-localize with active zone markers<sup>15,16</sup>. shRNA  
68 knockdown of Liprin- $\alpha$ 2<sup>17</sup> or genetic deletion of the Liprin- $\alpha$ 3<sup>16</sup> causes loss of presynaptic  
69 proteins, similar to assembly defects after ablation of the single invertebrate gene<sup>9-12,18</sup>. While  
70 these data implicate Liprin- $\alpha$  in active zone assembly, the vertebrate Liprin- $\alpha$  functions and their  
71 underlying mechanisms are not clear. Liprin- $\alpha$ 2 and Liprin- $\alpha$ 3 localize normally after genetic  
72 disruption of vertebrate active zones<sup>16,19,20</sup>, which may reflect an upstream assembly function  
73 similar to invertebrates<sup>11,12</sup>, or suggest that Liprin- $\alpha$  proteins are not part of the same protein  
74 complex. An upstream function aligns well with the broad interaction repertoire of Liprin- $\alpha$ , which  
75 includes active zone proteins, motors, cell adhesion proteins and cytoskeletal elements<sup>5,12,13,21-</sup>  
76<sup>25</sup>. Liprin- $\alpha$  interactions are further regulated by phosphorylation<sup>26</sup>, making it a candidate  
77 effector of kinase pathways that control exocytosis, for example of protein kinase A (PKA),  
78 phospholipase C (PLC)/protein kinase C (PKC), or Ca<sup>2+</sup>/calmodulin-dependent kinase II  
79 (CaMKII) signaling<sup>27</sup>. In aggregate, previous data suggest that Liprin- $\alpha$  may connect active  
80 zone assembly to upstream pathways for synapse development and plasticity.

81  
82 We here find that PKC phosphorylation of serine-760 (S760) of Liprin- $\alpha$ 3 rapidly triggers Liprin-  
83  $\alpha$ 3 phase separation. RIM and Munc13-1, two important active zone proteins, are co-recruited  
84 into plasma-membrane attached phase condensates, reminiscent of active zone assembly.  
85 Newly developed double knockout of Liprin- $\alpha$ 2 and Liprin- $\alpha$ 3 leads to loss of RIM and Munc13-  
86 1, impaired vesicle docking and a decreased pool of readily releasable vesicles. Abolishing  
87 Liprin- $\alpha$ 3 phosphorylation via a single point mutation prevents its phase separation and its ability  
88 to reverse defects in active zone structure and in the pool of releasable vesicles. Similarly, we  
89 discover rapid enhancement of RIM and Munc13-1 levels at the active zone upon activation of  
90 PKC, which necessitates Liprin- $\alpha$ 3 phosphorylation. We conclude that active zone structure is

91 dynamically modulated by Liprin- $\alpha$ 3 phase condensation under the control of PKC, establishing  
92 a role for liquid-liquid phase separation in presynaptic architecture and plasticity.

93

94 **Results**

95

96 **Liprin- $\alpha$ 3 rapidly undergoes phase separation under the control of PLC/PKC signaling**

97 Because Liprin- $\alpha$ 3 is regulated by phosphorylation and controls active zone assembly<sup>10,16,26</sup>, we  
98 asked whether Liprin- $\alpha$ 3 is modulated by kinase pathways to control release site structure.

99 Prominent presynaptic pathways operate via PKA, PLC/PKC, and CaMKII signaling<sup>27</sup>. We

100 expressed mVenus-tagged Liprin- $\alpha$ 3 in HEK293T cells and investigated whether activation or

101 inhibition of these pathways alters Liprin- $\alpha$ 3 distribution. Under basal conditions, mVenus-Liprin-

102  $\alpha$ 3 is predominantly soluble. Strikingly, after addition of the diacylglycerol analogue phorbol 12-

103 myristate 13-acetate (PMA), Liprin- $\alpha$ 3 rapidly formed spherical condensates (Figs. 1a, Extended

104 Data Fig. 1a and Movie 1). PMA mimics PLC-induced generation of diacylglycerol and activates

105 PKC, suggesting that Liprin- $\alpha$ 3 may be phosphorylated by PKC. This effect was not observed

106 for other manipulations, including inhibiting PKC, or activation or inhibition of PKA or CaMKII.

107 The reorganization of Liprin- $\alpha$ 3 into droplets occurred in all cells within minutes, was reversible

108 upon washout, and droplet formation was independent of the mVenus-tag (Figs. 1b, 1c,

109 Extended Data Figs. 1a-1c).

110

111 Formation of spherical droplets is indicative of liquid-liquid phase separation<sup>1,2</sup>. Principles of

112 liquid dynamics predict droplet fusion, which we observed (Extended Data Figs. 1d, 1e and

113 Movie 1), and exchange of molecules between condensates and the surrounding cytosol. To

114 test exchange, we assessed fluorescence recovery after photobleaching (FRAP), as

115 implemented before to study synaptic liquid phases<sup>6-8,28</sup>. Individual condensates recovered to

116 ~40% of the initial fluorescence at a fast rate ( $t_{1/2 \text{ recovery}} < 20$  s), and a second bleaching of the

117 same condensates resulted in near-complete recovery, again with  $t_{1/2 \text{ recovery}} < 20$  s, indicating

118 that the mobile fraction remains fully mobile (Figs. 1d, 1e).

119

120 We next assessed whether these fluorescent droplets are indeed membrane-free protein dense  
121 condensates. We used correlative light-electron microscopy (CLEM) and found that Liprin- $\alpha$ 3  
122 condensates were electron-dense structures without surrounding lipid bilayers (Figs. 1f, 1g). We  
123 conclude that Liprin- $\alpha$ 3 rapidly and reversibly forms phase-separated condensates as a function  
124 of PLC/PKC signaling.

125

### 126 **PKC phosphorylates Liprin- $\alpha$ 3 in vitro and in vivo to trigger condensate formation**

127 We hypothesized that PMA triggers PKC activation followed by phosphorylation of Liprin- $\alpha$ 3 to  
128 induce phase separation. To investigate whether Liprin- $\alpha$ 3 is a PKC substrate, we purified GST-  
129 fusion proteins covering the entire Liprin- $\alpha$ 3 protein, and incubated them with  $^{32}$ P-labelled ATP  
130 and recombinant PKC (Figs. 2a, 2b). The linker region between the LH and SAM regions most  
131 efficiently incorporated  $^{32}$ P, and mass spectrometry identified five phosphorylated serine  
132 residues (S650, S751, S760, S763 and S764, Extended Data Fig. 2a). Notably, S760, but not  
133 other residues, was surrounded by a PKC consensus sequence. To determine whether any of  
134 these residues is responsible for phase transition, we engineered point mutations in mVenus-  
135 Liprin- $\alpha$ 3 to abolish phosphorylation and expressed these constructs in HEK293T cells. S760A  
136 and S764A Liprin- $\alpha$ 3 were incapable of PMA-induced droplet formation, while other point  
137 mutations did not impair it (Extended Data Fig. 2b). To assess whether these residues are  
138 phosphorylated, we generated anti-phospho-S760 and -S764 Liprin- $\alpha$ 3 antibodies. Both  
139 antibodies detected a band at ~150 KDa in immunoblots of transfected HEK293T cells (Fig. 2c,  
140 Extended Data Fig. 2c). Upon PMA addition, and consistent with the PKC consensus sequence,  
141 the phospho-S760-Liprin- $\alpha$ 3 increased, and disappeared when co-incubated with PKC blockers,  
142 while phospho-S764 signals were unchanged. Phospho-S760 Liprin- $\alpha$ 3 was not detected in  
143 Liprin- $\alpha$ 3 knockout neuronal cultures (Fig. 2d), confirming antibody specificity. In vivo, phospho-  
144 S760 Liprin- $\alpha$ 3 was present in the frontal cortex, hippocampus, cerebellum and brain stem with  
145 high perinatal levels that gradually decreased over time (Extended Data Fig. 2d).

146

147 Our data establish that PKC phosphorylates Liprin- $\alpha$ 3 at S760. To corroborate that this site  
148 mediates phase separation, we generated phospho-dead (S760G, Liprin- $\alpha$ 3<sup>SG</sup>, using S->G  
149 substitution to make it similar to other Liprin- $\alpha$  proteins, Extended Data Fig. 2e) and phospho-  
150 mimetic (S760E, Liprin- $\alpha$ 3<sup>SE</sup>) mutants. Liprin- $\alpha$ 3<sup>SG</sup> abolished PKC-induced phase separation,  
151 and Liprin- $\alpha$ 3<sup>SE</sup> formed constitutive condensates independent of PKC activation (Figs. 2e, 2f).  
152 S760 is conserved in Liprin- $\alpha$ 3 across vertebrates, but it is a glycine residue in the other three  
153 vertebrate Liprin- $\alpha$ 's and in invertebrate proteins (Extended Data Fig. 2e). In line with a Liprin-  
154  $\alpha$ 3-specific function of S760, mimicking PLC/PKC signaling in HEK293T cells expressing Liprin-  
155  $\alpha$ 1, - $\alpha$ 2 or - $\alpha$ 4 did not change the distribution of any of these proteins, which was predominantly  
156 soluble for Liprin- $\alpha$ 1 and - $\alpha$ 4, and droplet-like for Liprin- $\alpha$ 2 (Extended Data Figs. 2f, 2g). We  
157 conclude that PKC phosphorylates S760 of Liprin- $\alpha$ 3 in vitro and in vivo to trigger Liprin- $\alpha$ 3  
158 phase separation.

159

### 160 **Liprin- $\alpha$ 3, RIM1 $\alpha$ and Munc13-1 are co-recruited into membrane-attached liquid** 161 **condensates**

162 We reasoned that if phase separation of Liprin- $\alpha$ 3 controls active zone assembly, active zone  
163 proteins must interact with this liquid phase. Co-expression of cerulean-Liprin- $\alpha$ 3 with either  
164 RIM1 $\alpha$ -mVenus or Munc13-1-tdTomato in HEK293T cells resulted in recruitment of each protein  
165 into PMA-induced condensates (Extended Data Fig. 3a). Discrete, PMA-insensitive  
166 condensates were also observed when RIM1 $\alpha$  was expressed alone (Extended Data Fig. 3b), in  
167 agreement with its intrinsic ability to phase separate<sup>6</sup>. Munc13-1 did not form droplets on its  
168 own, but PMA-dependent membrane recruitment was observed as previously described<sup>29-31</sup>.

169

170 Co-expression of cerulean-Liprin- $\alpha$ 3 with both RIM1 $\alpha$ -mVenus and Munc13-1-tdTomato in  
171 HEK293T cells resulted in large protein condensates, and addition of PMA increased their



172 number and size (Figs. 3a-3c). Remarkably, these condensates were not distributed throughout  
173 the cytosol, different from Liprin- $\alpha$ 3 phase condensates. Instead, they were in the cell periphery  
174 in close proximity to the plasma membrane, and the condensates contained all three proteins.  
175 To assess whether they were membrane attached, we used CLEM on PMA-treated cells. The  
176 fluorescent signals were highly overlapping with large protein densities that were not enclosed  
177 by membranes, but instead appeared attached at one side to the plasma membrane (Figs. 3d,  
178 3e).

179  
180 We finally used FRAP to assess turnover of Liprin- $\alpha$ 3, RIM1 $\alpha$  and Munc13-1 in these  
181 condensates. All three proteins rapidly recovered when the entire condensate was bleached  
182 (Figs. 3f, 3g) or when only small areas within large condensates were bleached (Extended Data  
183 Fig. 3c). Hence, membrane-attached condensates containing Liprin- $\alpha$ 3, RIM1 $\alpha$  and Munc13-1  
184 follow liquid dynamics. Overall, these data establish that Liprin- $\alpha$ 3, RIM1 $\alpha$  and Munc13-1 co-  
185 exist in protein-dense liquid condensates attached to the plasma membrane, and formation of  
186 these condensates is enhanced by PLC/PKC signaling.

187  
188 **PLC/PKC signaling increases active zone levels of Liprin- $\alpha$ 3, RIM and Munc13-1 at**  
189 **synapses**

190 Our findings suggest that activating PKC induces the formation of active zone-like, membrane-  
191 bound liquid condensates in transfected cells. If physiologically relevant, activation of this  
192 pathway should result in changes in active zone protein complexes at synapses. To test this, we  
193 assessed active zone levels of endogenous Liprin- $\alpha$ 3, RIM and Munc13-1 at synapses of  
194 cultured hippocampal neurons using stimulated emission depletion (STED) microscopy (Fig. 3h-  
195 3j). As described previously<sup>16,32-34</sup>, we restricted the analysis to side-view synapses to avoid  
196 skewing results by synapse orientation. Side-view synapses were identified by the position of a  
197 bar-shaped active zone (marked by Bassoon, imaged in STED mode) relative to a synaptic

198 vesicle cloud (identified by Synaptophysin, imaged in confocal mode), and the peak levels of  
199 proteins at active zones were measured within 100 nm of the Bassoon peak (see Extended  
200 Data Fig. 4a for an outline of synapse selection and analyses). Liprin- $\alpha$ 3, RIM and Munc13-1  
201 were predominantly clustered at the active zone with peak intensities falling within 50 nm from  
202 the peak of Bassoon (Extended Data Fig. 4b) as shown before<sup>16</sup>. Addition of PMA produced a  
203 significant 20-30% increase in peak active zone levels of Liprin- $\alpha$ 3, RIM and Munc13-1 (Figs. 3i,  
204 3j) without affecting Bassoon (Extended Data Figs. 4c-4e). Hence, mimicking PLC/PKC  
205 activation induces structural active zone plasticity with enhanced recruitment of RIM, Munc13-1  
206 and Liprin- $\alpha$ 3.

207

### 208 **Knockout of Liprin- $\alpha$ 2 and Liprin- $\alpha$ 3 alters presynaptic composition and ultrastructure**

209 If Liprin- $\alpha$  phase separation controls active zone assembly, Liprin- $\alpha$  knockout should impair its  
210 structure and function. We generated new knockout mice to simultaneously ablate Liprin- $\alpha$ 2 and  
211 Liprin- $\alpha$ 3, the main synaptic Liprin- $\alpha$  proteins (Extended Data Fig. 5)<sup>16,35</sup>. Conditional Liprin- $\alpha$ 2  
212 knockout mice (Liprin- $\alpha$ 2<sup>ff</sup>), generated by homologous recombination with exon 14 flanked by  
213 loxP sites (Extended Data Figs. 6a-6e), were crossed to homozygosity and subsequently bred  
214 to previously generated constitutive Liprin- $\alpha$ 3 knockout mice (Liprin- $\alpha$ 3<sup>-/-</sup>)<sup>16</sup> (Fig. 4a). We used  
215 cultured hippocampal neurons of Liprin- $\alpha$ 2<sup>ff</sup>/Liprin- $\alpha$ 3<sup>-/-</sup> mice infected with lentivirus expressing  
216 cre recombinase (to generate KO<sup>L23</sup> neurons) and neurons from Liprin- $\alpha$ 2<sup>ff</sup>/Liprin- $\alpha$ 3<sup>+/-</sup> mice  
217 infected with lentiviruses that express truncated, inactive cre recombinase (to generate  
218 control<sup>L23</sup> neurons). First, we assessed the composition of synapses by confocal microscopy by  
219 measuring protein levels within synapses (Fig. 4b). Liprin- $\alpha$ 2 and Liprin- $\alpha$ 3 were efficiently  
220 removed and the remaining signals are typical for antibody background<sup>19,33</sup>. The levels of RIM,  
221 Munc13-1 and ELKS were decreased by 25–40%, without significant changes in Bassoon, RIM-  
222 BP2, and other synaptic proteins. Surprisingly, the synaptic levels of Cav2.1 were increased by  
223 ~50%, as were those of Synapsin-1 but not Synaptophysin (Figs. 4b,4c, Extended Data Figs. 6f-

224 6h).

225

226 We next asked whether these changes in protein levels occur at the active zone and whether  
227 they are present in both excitatory and inhibitory synapses (marked with PSD-95 and Gephyrin,  
228 respectively (Extended Data Fig. 7)). At side-view synapses, the peak levels of Munc13-1, RIM,  
229 RIM-BP2 and Cav2.1 peaked at ~ 100 nm from the postsynaptic markers in agreement with  
230 their active zone localization<sup>16,34</sup>. Decreased active zone levels of Munc13-1 and RIM were  
231 observed in both synapse types in KO<sup>L23</sup> neurons, while the increase of Cav2.1 was restricted to  
232 excitatory synapses. Hence, Liprin- $\alpha$ 2 and - $\alpha$ 3 are necessary to maintain normal active zone  
233 structure.

234

235 High-pressure freezing followed by freeze substitution and electron microscopic imaging was  
236 used to investigate synaptic ultrastructure. The number of synaptic vesicles per synapse profile  
237 was decreased by ~15% in KO<sup>L23</sup> synapses, without changes in the overall bouton size or  
238 postsynaptic densities (Figs. 4d-h). A ~25% reduction of docked vesicles (identified as vesicles  
239 with no detectable space between the electron-dense vesicular and target membranes) was  
240 observed upon Liprin- $\alpha$ 2/ $\alpha$ 3 knockout, consistent with a partial loss of the docking proteins RIM  
241 and Munc13-1. We conclude that Liprin- $\alpha$ 2 and Liprin- $\alpha$ 3 are involved in maintaining presynaptic  
242 ultrastructure, specifically the number of vesicles per bouton and the number of docked  
243 vesicles.

244

### 245 **Synapse-specific impairments in neurotransmitter release at KO<sup>L23</sup> synapses**

246 The altered levels of Munc13-1, RIM and Cav2.1 and the decreased docking predict changes in  
247 synaptic secretion. Indeed, in whole-cell electrophysiological recordings, the frequency of  
248 spontaneous miniature excitatory and inhibitory postsynaptic currents (mEPSCs and mIPSCs,  
249 respectively) was decreased in KO<sup>L23</sup> neurons, but their amplitudes were unchanged (Figs. 5a-

250 5c, 5j-5l), establishing presynaptic roles of Liprin- $\alpha$  in synaptic vesicle release.

251

252 We used electrical stimulation or stimulation by hyperosmotic sucrose to evoke EPSCs (Figs.  
253 5d-5i) and IPSCs (Figs. 5m-5r). Release evoked by an action potential is proportional to the  
254 product of the number of vesicles that can be released (readily releasable pool, RRP) and the  
255 likelihood of a vesicle to be released (vesicular release probability,  $p$ )<sup>36,37</sup>. For action-potential  
256 triggered EPSCs, NMDA-receptor currents were measured instead of AMPA-receptor currents  
257 to avoid network activity that is prominent when AMPA-receptors are not blocked. Similar to  
258 confocal and STED microscopy, we observed synapse-specific changes. At excitatory and  
259 inhibitory KO<sup>L23</sup> synapses, the RRP estimated by the application of hypertonic sucrose was  
260 decreased (Figs. 5h, 5i, 5q, 5r), quantitatively matching the reduction in Munc13, RIM and  
261 docked vesicles (Fig. 4, Extended Data Fig. 7). We estimated  $p$  by measuring paired pulse  
262 ratios (PPRs), where the response ratio of two consecutive pulses at short interstimulus  
263 intervals is inversely correlated with  $p$ <sup>36</sup>. Excitatory KO<sup>L23</sup> synapses had an increased  $p$  (Figs.  
264 5f, 5g), matching well with the increased presence of Ca<sup>2+</sup> channels (Fig. 4, Extended Data Fig.  
265 7). Together, the reduction in RRP and increase in  $p$  offset one another and led to a normal  
266 EPSC (Fig. 5d, 5e). In contrast,  $p$  was unaffected at inhibitory synapses (Figs. 5o, 5p),  
267 matching with normal Ca<sup>2+</sup> channel levels, and leading to an overall decrease in the IPSC  
268 amplitude due to the RRP decrease (Figs. 5m, 5n). In summary, the electrophysiological  
269 phenotypes match with the structural active zone effects. Knockout of Liprin- $\alpha$ 2/ $\alpha$ 3 leads to  
270 reduction in docking, protein machinery for docking and priming and the pool of releasable  
271 vesicles at excitatory and inhibitory synapses, and a select increase in Ca<sup>2+</sup> channels and  
272 release probability at excitatory synapses.

273

#### 274 **PKC phosphorylation of Liprin- $\alpha$ 3 at S760 enhances the readily releasable pool**

275 Next, we asked whether re-expression of wild type Liprin- $\alpha$ 3 reverses the presynaptic

276 phenotypes of KO<sup>L23</sup> neurons. Lentiviral expression of Liprin- $\alpha$ 3 in KO<sup>L23</sup> neurons restored active  
277 zone levels of Liprin- $\alpha$ 3 (Extended Data Figs. 8a-8d), the RRP (Extended Data Figs. 8e, 8f), as  
278 well as the reduced active zone levels of RIM (Extended Data Figs. 8g, 8h). Hence, the active  
279 zone impairments at excitatory KO<sup>L23</sup> synapses are reversible by re-expression of Liprin- $\alpha$ 3.

280

281 We reasoned that if Liprin- $\alpha$ 3 functions depend on its propensity to phase separate, its ability to  
282 rescue should be altered when S760 is mutated to abolish phase separation. We directly  
283 compared the ability of wild type Liprin- $\alpha$ 3 and Liprin- $\alpha$ 3<sup>SG</sup> to rescue RRP and RIM (Fig. 5s-5w).  
284 Liprin- $\alpha$ 3 proteins (N-terminally tagged with an HA epitope) were expressed in KO<sup>L23</sup> neurons  
285 using lentiviral transduction. At DIV15, both forms of Liprin- $\alpha$ 3 were enriched at active zones,  
286 but the peak levels of Liprin- $\alpha$ 3<sup>SG</sup> were somewhat decreased compared to Liprin- $\alpha$ 3 (~15%;  
287 Extended Data Figs. 8i-8l). Expression of wild type Liprin- $\alpha$ 3 increased the RRP and RIM active  
288 zone levels by ~40% in KO<sup>L23</sup> neurons, while expression of Liprin- $\alpha$ 3<sup>SG</sup> failed to produce any  
289 significant increase (Figs. 5t-5w). We conclude that the PKC phosphorylation site of Liprin- $\alpha$ 3,  
290 which drives phase separation, is essential for a normal RRP and normal active zone structure.

291

### 292 **Liprin- $\alpha$ 3 phase separation acutely modulates active zone structure and function**

293 PLC/PKC signaling acutely enhances active zone assembly (Fig. 3) and neurotransmitter  
294 release<sup>38-40</sup>. We hypothesized that this enhancement may be mediated by phosphorylation and  
295 phase separation of Liprin- $\alpha$ 3, and compared the effect of PKC activation by PMA in KO<sup>L23</sup>  
296 neurons expressing either wild type Liprin- $\alpha$ 3 or phase separation-incapable Liprin- $\alpha$ 3<sup>SG</sup>. PMA  
297 rapidly enhanced mEPSC frequencies and amplitudes (Figs. 6a-6f) as observed before<sup>40</sup>,  
298 indicating that these pathways potentiate synaptic transmission through pre- and postsynaptic  
299 effectors. The magnitude of the increase of the mEPSC frequency was impaired by 50% in  
300 Liprin- $\alpha$ 3<sup>SG</sup> expressing neurons (Fig. 6a-6c), establishing that Liprin- $\alpha$  phosphorylation is  
301 important for this enhancement. Similarly, the RRP estimated by hyperosmotic sucrose

302 application was increased, but this was significantly tempered when non-phosphorylatable  
303 Liprin- $\alpha$ 3 was present (Fig. 6g-6i). It is noteworthy that the RRP enhancement is overestimated  
304 because of the robust increase in mEPSC amplitude (Fig. 6f), and as a consequence the  
305 impairment in pool enhancement of Liprin- $\alpha$ 3<sup>SG</sup> is likely underestimated. In summary, these data  
306 indicate that PKC phosphorylation and phase separation of Liprin- $\alpha$ 3 modulate the RRP.

307

308 We finally investigated whether Liprin- $\alpha$ 3 phase separation controls active zone structure. We  
309 assessed side-view synapses of KO<sup>L23</sup> neurons, or of KO<sup>L23</sup> neurons expressing either Liprin- $\alpha$ 3  
310 or Liprin- $\alpha$ 3<sup>SG</sup>. In both rescue conditions, Liprin- $\alpha$ 3, RIM and Munc13-1 were enriched at the  
311 active zone. As observed in Fig. 3h-3j, active zone levels of these proteins, but not of Bassoon,  
312 robustly increased upon PMA addition by ~30-35% when Liprin- $\alpha$ 3 was present (Fig. 7a-7i,  
313 Extended Data Fig. 9). This increase, however, was significantly impaired and indistinguishable  
314 from KO<sup>L23</sup> neurons when only Liprin- $\alpha$ 3<sup>SG</sup> was present. Together, these data show that active  
315 zone structure is rapidly modulated by PLC/PKC signaling via phosphorylation and phase  
316 separation of Liprin- $\alpha$ 3.

317

318 **Discussion**

319

320 Self-assembly of proteins into liquid phases is a biophysical mechanism used by cells for the  
321 formation of membrane-less compartments<sup>1,2</sup>. We investigated molecular pathways that drive  
322 and modulate assembly of the presynaptic active zone, and demonstrate that (1) PKC  
323 phosphorylates Liprin- $\alpha$ 3 at S760 to drive the formation of membrane-attached liquid  
324 condensates containing RIM1 $\alpha$  and Munc13-1, (2) genetic ablation of the synaptic Liprin- $\alpha$   
325 proteins leads to defects in active zone structure and function, including the loss of RIM and  
326 Munc13-1, and (3) RIM and Munc13-1 active zone levels and neurotransmitter release are  
327 acutely upregulated by PKC phosphorylation of S760 followed by phase separation of Liprin- $\alpha$ 3.  
328 These results lead to a model in which presynaptic phase separation triggered by Liprin- $\alpha$ 3  
329 phosphorylation rapidly induces plasticity in active zone structure and neurotransmitter release  
330 (Fig. 7j).

331

332 **Phase separation of Liprin- $\alpha$ 3**

333 Our work establishes a fast mechanism that triggers phase separation of Liprin- $\alpha$ 3 into liquid  
334 condensates via phosphorylation at S760. Phosphorylation of this region between the LH and  
335 SAM domains likely leads to the formation of condensates by increasing Liprin-monomer self-  
336 assembly past a critical threshold. This increase could be mediated by enhancing or enabling  
337 interactions of the phosphorylated linker itself, by recruitment of adaptors, or by inducing Liprin-  
338  $\alpha$ 3 conformational changes that expose previously occluded domains to enable new Liprin- $\alpha$ 3  
339 interactions. The third scenario appears most likely because S760 is not part of the N-terminal  
340 sequences that mediate Liprin- $\alpha$  dimerization<sup>13,14</sup> and in which a gain-of-function mutant that  
341 promotes active zone assembly was isolated<sup>12</sup>.

342

343 There are notable differences in condensate formation across vertebrate Liprin- $\alpha$  proteins. Only

344 Liprin- $\alpha$ 2 and Liprin- $\alpha$ 3 phase separate, in line with their competition for positioning at the active  
345 zone<sup>16</sup>. However, roles in active zone structural plasticity are likely unique to Liprin- $\alpha$ 3 because  
346 PKC-mediated triggering of phase separation is limited to this isoform. Liprin- $\alpha$ 1 and Liprin- $\alpha$ 4  
347 do not form condensates in transfected cells and may either operate through different  
348 mechanisms or lack important components for phase condensation in these cells. Importantly,  
349 these Liprins show a prominent dendritic localization<sup>15,41</sup> and at least Liprin- $\alpha$ 1 operates in  
350 neuronal arborization<sup>42</sup>. Together, a picture emerges where the ability to phase separate  
351 determines the cellular function of Liprin- $\alpha$ .

352

### 353 **Interactions of presynaptic liquid phases**

354 RIM1 $\alpha$  and RIM-BP2 form liquid condensates in vitro, and these condensates organize tethering  
355 of voltage-gated calcium channels<sup>6,43</sup>. The question arises whether Liprin- $\alpha$ 3 is part of the same  
356 phase within a nerve terminal, or whether multiple independent phases co-exist. The current  
357 evidence is most compatible with a model of multiple distinct phases. First, active zone levels of  
358 RIM and Munc13-1 decrease upon ablation of Liprin- $\alpha$ 2 and Liprin- $\alpha$ 3, but those of Ca<sub>v</sub>2.1  
359 increase and those of RIM-BP2 are unchanged. Similarly, ablation of RIM-BP and RIM<sup>20</sup>, or of  
360 RIM and ELKS<sup>19</sup>, does not lead to loss of presynaptic Liprin- $\alpha$ . Hence, these proteins are at  
361 least partially in distinct protein complexes, or phases. Second, Ca<sub>v</sub>2.1 and Munc13-1 do not  
362 co-localize when assessed at nanometer resolution using immunogold labeling, indicating that  
363 distinct clustering mechanisms are present<sup>44</sup>. In aggregate, it appears most likely that distinct  
364 liquid assemblies may exist within an active zone, one containing RIM1 and RIM-BP2 to tether  
365 calcium channels<sup>3,6</sup>, and a different phase with Liprin- $\alpha$ , RIM and Munc13-1. It is interesting that  
366 RIM may participate in multiple condensates, perhaps suggesting that it promotes interactions  
367 across liquid phases. This may also be true for synaptic vesicle clusters, which are organized  
368 through Synapsin phase separation<sup>7</sup>. Release requires the transition of synaptic vesicles from  
369 the cluster to release sites. It appears possible that RIM/Liprin- $\alpha$ /Munc13 phases embody such



370 sites (this study and <sup>45,46</sup>), and that RIM allows for recruitment of vesicles from the vesicle phase  
371 to release sites, consistent with its roles in vesicle docking <sup>43,47,48</sup>. As such, the tethering and  
372 docking reaction could be seen as the transition of a vesicle from Synapsin-phase association to  
373 active zone-phase association.

374

375 The existence of multiple phase separation-based pathways for active zone assembly may  
376 explain difficulties in understanding its assembly mechanisms. Removal of each protein family,  
377 for example of Liprin- $\alpha$  (this study), RIM <sup>43,49,50</sup>, or RIM-BP <sup>51,52</sup>, leads to at most partial assembly  
378 defects, but combinations of mutations are required to disrupt active zones <sup>19,20,53</sup>. This  
379 redundancy may also be the reason why active zone protein deletions can lead to synapse-  
380 specific secretory deficits <sup>54,55</sup>. In summary, this and previous work support the model that there  
381 is no single master active zone organizer. Instead, redundant low-affinity interactions organize  
382 release sites <sup>4</sup>. An important remaining question is how these phases are attached to the target  
383 membrane. Because disruption of the predominant candidate mechanisms did not lead to active  
384 zone disassembly or displacement from the target membrane <sup>33,34,56,57</sup>, these mechanisms  
385 remain obscure.

386

### 387 **Presynaptic phase separation in active zone assembly and function**

388 Previously described active zone condensates form constitutively <sup>6</sup>, but modulating their  
389 formation is ideally suited to explain rapid changes during plasticity. Phosphorylation has been  
390 found to regulate phase condensation <sup>58</sup>, and synapsin phases that cluster vesicles may be  
391 rapidly dispersed by CamKII activation <sup>7</sup>. Our work uncovers a regulatory pathway that induces  
392 structural active zone plasticity through phase separation. We propose that a fraction of Liprin-  
393  $\alpha$ 3 is soluble and that phosphorylation by PKC nucleates the transition of Liprin- $\alpha$ 3 into liquid  
394 condensates to recruit additional Liprin- $\alpha$ 3, RIM, Munc13-1, and possibly other active zone  
395 proteins. This allows addition of secretory machinery to the membrane to enhance release.

396 Modulation of Liprin- $\alpha$ 3 phase separation by PKC complements the other presynaptic  
397 mechanisms for PLC/PKC-triggered potentiation, including those mediated by Munc13<sup>38</sup>,  
398 Munc18<sup>39</sup> and Synaptotagmin-1<sup>40</sup>, further supporting the involvement of multiple parallel  
399 mechanisms<sup>27</sup>.

400

401 Finally, the question arises whether Liprin- $\alpha$ 3 phase separation may control synapse and active  
402 zone formation during development. This appears likely because S760-phosphorylated Liprin-  
403  $\alpha$ 3 is more prominent early postnatally and blocking phase separation of Liprin- $\alpha$ 3 throughout  
404 development results in basal defects of active zone structure. Liprin- $\alpha$  liquid condensates may  
405 interact with a wide range of synaptic proteins to broadly orchestrate assembly<sup>5,12,13,21-25</sup>. This  
406 may include interactions with vesicles, cytoskeletal elements and trafficking machinery,  
407 potentially explaining why some synaptic vesicles are lost in Liprin- $\alpha$  deficient synapses<sup>9-11,59,60</sup>.  
408 During development, it is likely that phase separation and recruitment of presynaptic material  
409 occur independent of phosphorylation and involve additional proteins. For instance, other Liprin-  
410  $\alpha$  isoforms or ELKS, which captures synaptic material and phase separates<sup>32,61</sup>, may play  
411 active roles. In conclusion, an overarching model arises in which phase transition of presynaptic  
412 proteins is essential to recruit and assemble presynaptic material into functional molecular  
413 machines.

414

415 **Acknowledgements**

416 We thank J. Wang, E. Atwater, M. Sanghvi and M. Han for technical support, Drs. R. Held, C.  
417 Tan and N. Nyitrai for help and advice, and all members of the Kaeser laboratory for insightful  
418 discussions. We thank Dr. S. Schoch for Liprin- $\alpha$  antibodies, and Drs. M. Verhage and J. Broeke  
419 for the SynapseEM MATLAB macro. This work was supported by grants from the NIH  
420 (R01NS083898 and R01MH113349 to PSK, R35GM130386 to T.K.), the Lefler Foundation (to  
421 PSK), the Armenise Harvard Foundation (to PSK), a grant from the Novo Nordisk  
422 Foundation/Danish Technical University (NNF16OC0022166 to T.K.), a Biogen Sponsored  
423 Research Agreement (to T.K), and fellowships from the Alice and Joseph E. Brooks  
424 postdoctoral fund (to JEM), the Croucher foundation (to MYW), Lefler foundation (to MYW) and  
425 the NSF (graduate research fellowship DGE1144152 to S.S.H.W.). We acknowledge the  
426 Neurobiology Imaging Facility (supported by a P30 Core Center Grant NS072030), and the  
427 Electron Microscopy Facility at Harvard Medical School.

428

429 **Author Contributions**

430 Conceptualization, J.E-M., M.Y.W. and P.S.K.; Methodology, J.E-M., M.Y.W., G.dN. and T.K.;  
431 Investigation, J.E-M., M.Y.W., S.S.W. and G.dN.; Formal Analysis, J.E-M., M.Y.W., S.S.W.,  
432 G.dN., T.K. and PSK; Writing-Original Draft, J.E-M and P.S.K.; Supervision, P.S.K.; Funding  
433 Acquisition P.S.K.

434

435 **Conflict of interest statement**

436 The authors declare no competing interests. S.S.W. is currently an employee of RA Capital  
437 Management LP. MYW is currently an employee of Novartis. T.K. is a visiting scientist at  
438 Biogen.

439

## 440 **Materials and methods**

441

### 442 **Assessments of droplets in transfected HEK293T cells**

443 HEK293T cells were plated on 0.1 mm thick coverslips and transfected with plasmids  
444 expressing proteins of interest under the CMV promoter. 500 ng of DNA per well (1,9 cm<sup>2</sup>) were  
445 used for single plasmid transfections. If multiple plasmids were transfected, additional DNA was  
446 used at a 1:1 molar ratio. Cultures were fixed in 4% paraformaldehyde 10 – 16 h after  
447 transfection. Longer expression times or higher amounts of DNA were avoided to limit protein  
448 aggregation. Drugs were added 15 min before cells were fixed at the following concentrations:  
449 forskolin (10 μM, Sigma), phorbol 12-myristate 13-acetate (PMA, 1 μM, Sigma), caffeine (1 mM,  
450 Sigma), H-89 (5 μM, Abcam), bisindolylmaleimide-I (Bis-I, 0.1 μM, Sigma), KN-93 (1 μM,  
451 Abcam) and cells were fixed in the presence of drugs. When non-fluorescently-tagged proteins  
452 were expressed, staining with primary (rabbit anti Liprin-α1 (A121), -α2 (A13), -α3 (A115) and -  
453 α4 (A2) 1:250; gifts from S. Schoch<sup>35</sup>) and 488 Alexa-conjugated secondary antibodies  
454 (overnight at 4°C in both cases) was performed. Images were acquired with a Leica SP8  
455 Confocal/STED 3X microscope, using an oil-immersion 63X objective. For single protein  
456 expression, quantification was done manually, including only spherical condensates or rings of  
457 >1 μm in diameter. To quantify the amount and size of protein structures created by Liprin-α3,  
458 RIM1α and Munc13-1, the “Analyze particles” plug-in (Fiji) was used with automatic thresholding  
459 of the Munc13-1 channel and a minimum diameter of 1 μm. In all experiments comparing  
460 different proteins or treatments, the experimenter was blind to the condition throughout data  
461 acquisition and analyses. For Fluorescence Recovery After Photobleaching (FRAP), HEK293T  
462 cells were plated on 35-mm plastic dishes containing 0.15 mm thick coverslips. 12 – 15 h after  
463 transfection and 10 min after PMA addition, the dishes were transferred to the microscope stage  
464 and single droplets or peripheral condensates were photobleached using a 405 nm wavelength  
465 laser followed by image acquisition at a 1 (Fig. 1) or 3 (Fig. 3) Hz sampling frequency in

466 confocal mode. HEK293T cells were kept in the tissue culture medium containing 1  $\mu$ M PMA  
467 and imaged at room temperature within 1 h of PMA addition. Regions of interest were drawn  
468 over pre-bleached structures and the percentage of intensity recovered was plotted as a  
469 function of time.  $t_{1/2 \text{ recovery}}$  was calculated as the time it takes for fluorescence to reach 50% of  
470 the maximum recovery after bleaching. Images were acquired using a Leica SP8  
471 Confocal/STED 3X microscope, using an oil-immersion 63X objective. The following N-  
472 terminally tagged (unless noted otherwise) plasmids were used: pCMV HA-Liprin- $\alpha$ 1 (p462),  
473 pCMV HA-Liprin- $\alpha$ 2 (p463), pCMV HA-Liprin- $\alpha$ 3 (p470), pCMV GFP-Liprin- $\alpha$ 4 (p466), pCMV  
474 Cerulean-Liprin- $\alpha$ 3 (p471), pCMV mVenus-Liprin- $\alpha$ 3 (p472), pCMV mVenus-Liprin- $\alpha$ 3  
475 Y648A+S650A+S651A (p516), pCMV mVenus-Liprin- $\alpha$ 3 S751A (p499), pCMV mVenus-Liprin-  
476  $\alpha$ 3 S760A (p500), pCMV mVenus-Liprin- $\alpha$ 3 S760G (p507), pCMV mVenus-Liprin- $\alpha$ 3 S760E  
477 (p503), pCMV mVenus-Liprin- $\alpha$ 3 S763A (p510) and pCMV mVenus-Liprin- $\alpha$ 3 S764A (p514),  
478 pCMV RIM1 $\alpha$ -mVenus (p587; tag placed before the C2B domain, which does not interfere with  
479 protein function<sup>33,43</sup>), and pcDNA Munc13-1-tdTomato (p888; tag placed at the C-terminus).

480

### 481 **Expression and purification of GST-Liprin- $\alpha$ 3 proteins**

482 GST-tagged fusion proteins were generated, expressed and purified according to standard  
483 procedures and as described<sup>32</sup>. Briefly, proteins were expressed at 20°C in *E. coli* BL21 cells  
484 after induction with 0.05 mM isopropyl b-D-1-thiogalactopyranoside for 20 h, and pelleted by  
485 centrifugation (45 min on 3,500 x g). For purification of GST-fusion proteins, bacterial pellets  
486 were resuspended and lysed for 30 min in PBS buffer supplemented with 0.5 mg/mL lysozyme,  
487 0.5 mM EDTA, and a protease inhibitor cocktail, followed by brief sonication and centrifugation  
488 (45 min on 11,200 x g). Next, bacterial supernatants were incubated with glutathione-Sepharose  
489 resin (GE Healthcare) for 1.5 h at 4°C with gentle rotation, washed three times in PBS and  
490 stored until further use (for no more than 5 d after purification). All steps after protein induction  
491 were conducted at 4°C using ice-cold solutions. Protein concentrations were estimated in SDS-

492 gel electrophoresis and Coomassie staining using increasing BSA concentrations as reference.  
493 The following GST-tagged proteins were produced from pGEX-KG2 constructs: pGEX Liprin- $\alpha$ 3  
494 1 – 188 (p567), pGEX Liprin- $\alpha$ 3 189 – 576 (p568), pGEX Liprin- $\alpha$ 3 577 - 790, (p566) and pGEX  
495 Liprin- $\alpha$ 3 791 – 1192 (p570). Amino acid numbering follows NM\_001270985.2.

496

#### 497 **In-vitro phosphorylation of Liprin- $\alpha$ 3 domains**

498 40  $\mu$ g of fusion proteins bound to glutathione beads were incubated for 30 min in 200  $\mu$ L of PKC  
499 reaction buffer (20 mM HEPES, 10 mM MgCl<sub>2</sub>, 1.67 mM CaCl<sub>2</sub>, 150 mM NaCl, 1 mM DTT) with  
500 0.25 ng/ $\mu$ l PKC (Promega, V526A), 1  $\mu$ M PMA, 1  $\mu$ M Phosphatidyl Serine (Sigma, P7769) and  
501 200  $\mu$ M ATP (Sigma, A2383). For experiments in which phosphorylation was detected by  
502 autoradiography, 10  $\mu$ Ci <sup>32</sup>P- $\gamma$ -ATP (Perkin Elmer) was added to the PKC reaction mix and  
503 incubated for an additional 1 hr at 30 °C, followed by gel electrophoresis. For mass  
504 spectrometric analysis, the phosphorylated GST Liprin- $\alpha$ 3 577 - 790 protein was isolated by  
505 SDS gel electrophoresis, Coomassie blue staining and cutting out of the protein band after the  
506 initial PKC reaction. The sample was processed by the HMS Taplin Mass Spectrometry Facility  
507 for identification of phosphorylated amino acid residues.

508

#### 509 **Generation of custom antibodies**

510 Custom antibodies were generated using procedures as described <sup>34</sup>. In brief, phospho-specific  
511 Liprin- $\alpha$ 3 antibodies were generated using keyhole limpet hemocyanin (KLH) conjugated  
512 CKAPKRK(pSer)IKSSIGR or CAPKRKSIKS(pSer)IGRL, for phospho-S760 and phospho-S764,  
513 respectively. KLH-conjugated peptides were injected into rabbits whose sera had been pre-  
514 screened to prevent non-specific antibody signal. Rabbits were given boosters every 2 weeks  
515 and bleeds were collected every 3 weeks. Serum that showed the strongest Liprin specificity in  
516 western blotting were processed by affinity purification as described <sup>34</sup>.

517

518 **Western blotting**

519 Samples were prepared in SDS sample buffer as described <sup>32</sup>, run on SDS-PAGE gels and  
520 transferred to nitrocellulose membranes at 4 °C for 6.5 hr in buffer containing (per L) 200 mL  
521 methanol, 14 g glycine and 6 g Tris, followed by a 1 h block at room temperature in saline buffer  
522 with 10% non-fat milk powder and 5% normal goat serum. Primary antibodies were incubated  
523 overnight at 4 °C in saline buffer with 5% milk and 2.5% goat serum, followed by 1 h incubation  
524 at room temperature with horseradish peroxidase-conjugated secondary antibodies prior to  
525 visualization of the protein bands. Primary antibodies used: rabbit anti Liprin- $\alpha$ 1 (A121, 1:500),  
526 Liprin- $\alpha$ 2 (A13, 1:500), Liprin- $\alpha$ 3 (A115, 1:500) and Liprin- $\alpha$ 4(A2, 1:500) were gifts from S.  
527 Schoch <sup>35</sup>; rabbit anti phospho-760 Liprin- $\alpha$ 3 (generated for this study; A231; 1:1000) and  
528 phospho-764 Liprin- $\alpha$ 3 (generated for this study; 1:1000); mouse anti HA (A12, 1:500; RRID:  
529 AB\_2565006); mouse anti Synaptophysin (A100, 1: 5000; RRID:AB\_887824) and mouse anti  
530 Synapsin-1 (A57, 1:5000; RRID: AB\_2617071). Three 5 min washes were performed between  
531 steps.

532

533 **Neuronal cultures and production of lentiviruses**

534 Primary hippocampal cultures were prepared as described <sup>16,32-34</sup>. Briefly, newborn (P0-P1)  
535 pups were anesthetized on ice slurry prior to hippocampal dissection. Hippocampi were  
536 digested and dissociated, and neurons were plated onto glass coverslips in Plating Medium  
537 composed of Minimum Essential Medium (MEM) supplemented with 0.5% glucose, 0.02%  
538 NaHCO<sub>3</sub>, 0.1 mg/mL transferrin, 10% Fetal Select bovine serum, 2mM-glutamine, and 25  
539 mg/mL insulin. 24 h after plating, Plating Medium was exchanged with Growth Medium  
540 composed of MEM with 0.5% glucose, 0.02% NaHCO<sub>3</sub>, 0.1 mg/mL transferrin, 5% Fetal Select  
541 bovine serum (Atlas Biologicals FS-0500-AD), 2% B-27 supplement, and 0.5 mM L-glutamine.  
542 At DIV2-3, 4 mM Cytosine b-D-arabinofuranoside (AraC) was added. Cultures were kept in a 37  
543 °C tissue culture incubator until DIV15 – 17. Lentiviruses were produced in HEK293T cells

544 maintained in DMEM supplemented with 10% fetal bovine serum and 1%  
545 penicillin/streptomycin. HEK293T cells were transfected using the calcium phosphate method  
546 with the lentiviral packaging plasmids REV, RRE and VSV-G and a separate plasmid encoding  
547 the protein of interest, at a molar ratio 1:1:1:1. 24 h after transfection, the medium was changed  
548 to neuronal growth medium and, 18 - 30 later the supernatant was used for immediate  
549 transduction. Neuronal cultures were infected 4 - 5 d after plating with lentiviruses expressing  
550 GFP-Cre or an inactive variant of GFP-Cre expressed under the human Synapsin promoter<sup>62</sup>.  
551 For rescue, cultures were infected at DIV1 – 2 with a lentivirus expressing Liprin- $\alpha$ 3 or Liprin-  
552  $\alpha$ 3<sup>SG</sup>, or an empty lentivirus as control. pFSW HA-Liprin- $\alpha$ 3 S760G was generated for this study;  
553 pFSW control (p008) and pFSW HA-Liprin- $\alpha$ 3 (p526) were previously described<sup>16</sup>. For PMA  
554 experiments, PMA was added 15 - 20 min before fixation to a final dilution of 1  $\mu$ M (from a 1 mM  
555 stock diluted in DMSO), and neurons were washed and fixed or recorded in the presence of the  
556 drug. – PMA controls were incubated in the same amount of DMSO.

557

### 558 **Immunofluorescence staining and confocal microscopy of neurons**

559 Neurons grown on #1.5 (for STED) or # 1.0 (confocal) glass coverslips were fixed in 4%  
560 paraformaldehyde for 10 min at DIV15-17, blocked and permeabilized in blocking solution (3%  
561 BSA/0.1% Triton X-100/PBS) for 1 h, incubated overnight with primary antibodies followed by  
562 overnight incubation with Alexa-conjugated secondaries (Thermo Fisher), and mounted onto  
563 glass slides. Antibodies were diluted in blocking solution. For STED imaging, coverslips were  
564 additionally post-fixed in 4% paraformaldehyde for 10 min. Three 5 min washes with PBS were  
565 performed between steps. All steps were performed at room temperature except for antibody  
566 incubations (4 °C). Primary antibodies used: mouse anti Bassoon (A85, 1:50;  
567 RRID:AB\_11181058), rabbit anti Liprin- $\alpha$ 2 (A13, 1:250; gift from S. Schoch<sup>35</sup>) and - $\alpha$ 3 (A115,  
568 1:250; gift from S. Schoch<sup>35</sup>), rabbit anti RIM (A58, 1:500, RRID: AB\_887774), mouse anti  
569 PSD-95 (A149, 1:500; RRID: AB\_10698024), mouse anti Gephyrin (A8, 1:500;



570 RRID:AB\_2232546), rabbit anti Synapsin-1 (A30, 1:500; RRID:AB\_2200097), mouse anti  
571 Synapsin-1 (A57, 1:500; RRID: AB\_2617071), guinea pig anti Synaptophysin (A106, 1:500;  
572 RRID: AB\_1210382), rabbit anti RIM-BP2 (A126, 1:500; RRID: AB\_2619739), rabbit anti  
573 Munc13-1 (A72, 1:500; RRID: AB\_887733), rabbit anti Cav2.1 (A46, 1:500; RRID:  
574 AB\_2619841), mouse anti HA (A12, 1:500; RRID: AB\_2565006), mouse anti ELKS1 (A48,  
575 1:500; RRID:AB\_10841908), rabbit anti ELKS2 (1:100; A136), mouse anti MAP2 (A108, 1:500;  
576 RRID: AB\_477193), rabbit anti MAP2 (A139, 1:500; RRID: AB\_2138183), mouse anti GluA1  
577 (A82; 1:100; RRID:AB\_2113443). Confocal images were taken on an Olympus FV1200 confocal  
578 microscope equipped with a 60X oil immersion objective or a Leica SP8 Confocal/STED 3X  
579 microscope with a 63X oil immersion objective. Images of experiments with multiple groups  
580 were acquired within a single session per culture and identical settings for each condition were  
581 used within an imaging session. For quantitative analyses of synaptic protein levels, the  
582 synaptic vesicle marker signal was used to define puncta as ROIs, and the average intensity  
583 within ROIs was quantified after local background was subtracted using the “rolling average”  
584 ImageJ plugin (diameter = 1.4 $\mu$ m). Data was plotted normalized to the average intensity of the  
585 control group (control<sup>L23</sup>) per culture. For co-localization analyses, the “Coloc 2” imageJ plugin  
586 was used following default thresholding. For example images, brightness and contrast were  
587 linearly adjusted equally between groups and interpolated to meet publication criteria.

588

### 589 **STED Imaging of synapses**

590 Images were acquired with a Leica SP8 Confocal/STED 3X microscope equipped with an oil-  
591 immersion 100X 1.44-N.A objective, white lasers, STED gated detectors, and 592 nm and 660  
592 nm depletion lasers as described<sup>16,32-34</sup>. Synapse-rich areas were selected and were scanned  
593 at 22.5 nm per pixel. Triple color sequential confocal scans were followed by dual-color  
594 sequential STED scans. Identical settings were applied to all samples within an experiment. For  
595 quantification, side-view synapses (selected while blind to the protein of interest) were defined

596 as synapses that contained a vesicle cluster (imaged in confocal mode, >300 nm wide) with an  
597 elongated Bassoon, Gephyrin or PSD-95 (active zone or postsynaptic density markers,  
598 respectively, imaged by STED) structure along the edge of the vesicle cluster<sup>16,32–34</sup>. A 1 µm-  
599 long, 250-nm-wide profile was selected perpendicular to the active zone/postsynaptic density  
600 marker and across its center. The intensity profile was then obtained for markers and for the  
601 protein of interest. Peak levels of the protein of interest were measured as the maximum  
602 intensity of the line profile within 100 nm of the active zone/postsynaptic density marker peaks  
603 (estimated active zone area based on<sup>16</sup>) after applying a 5-pixel rolled average. Only for  
604 representative images, a smooth filter was added and brightness and contrast were linearly  
605 adjusted using ImageJ. Equal adjustments were performed for all images within a given  
606 experiment. Finally, images were interpolated to match publication standards. Quantitative  
607 analyses were performed on original images without any processing, and all data were acquired  
608 and analyzed by an experimenter blind to genotype and/or condition.

609

## 610 **Mouse lines**

611 Liprin-α2 (*Ppfia2*) mutant mice were acquired from MRC Harwell (C57BL/6N-  
612 *Ppfia2*<tm1a(EUCOMM)Hmgu>/H)<sup>63</sup>. The mice were generated by homologous recombination  
613 and first were crossed to Flp-expressing mice<sup>64</sup> to remove the LacZ/Neomycin cassette to  
614 generate the conditional allele, which contains loxP sites flanking exon 14. Conditional Liprin-α2  
615 mice were kept as homozygotes, and genotyped using oligonucleotide primers  
616 GCCTCTTAACATTCCTACTGTACC and CCAGTGTGTACTGGAGACAAGC for the wild-type  
617 allele (336 band), and GCCTCTTAACATTCCTACTGTACC and  
618 CTGCGACTATAGAGATATCAACC for the floxed allele (517 band). To generate Liprin-α2/α3  
619 double mutant mice, conditional Liprin-α2 knockout mice were crossed to previously described  
620 constitutive Liprin-α3 mice that were generated by CRISPR/Cas9-mediated genome editing<sup>16</sup>.  
621 The line was maintain using intercrosses between Liprin-α2<sup>ff</sup>/Liprin-α3<sup>-/-</sup> and Liprin-α2<sup>ff</sup>/Liprin-

622  $\alpha 3^{+/-}$  mice. For experiments, hippocampal neurons cultured from individual P0 Liprin- $\alpha 2^{flf}$ /Liprin-  
623  $\alpha 3^{-/-}$  pups were infected with lentivirus expressing Cre recombinase (to generate KO<sup>L23</sup> neurons)  
624 and compared to Liprin- $\alpha 2^{flf}$  x Liprin- $\alpha 3^{+/-}$  littermates infected with lentiviruses that express a  
625 truncated, inactive mutant of Cre (to generate control<sup>L23</sup> neurons)<sup>62</sup>, both expressed via a  
626 human synapsin promoter. For rescue experiments comparing Liprin- $\alpha 3$  with Liprin- $\alpha 3^{SG}$ , the  
627 genotype of the breeders was Liprin- $\alpha 2^{flf}$ /Liprin- $\alpha 3^{-/-}$  and neurons were cultured from pooled  
628 hippocampi from multiple pups of the same litter, followed by addition of rescue virus and of  
629 lentivirus expressing Cre recombinase as described under neuronal cultures. All animal  
630 experiments were approved by the Harvard University Animal Care and Use Committee.

631

### 632 **Electron microscopy of cultured neurons**

633 Electron microscopy was performed as described<sup>19,34</sup>. Briefly, neurons grown on 0.12-mm-thick  
634 carbon-coated sapphire coverslips were transferred to extracellular solution containing (in mM)  
635 140 NaCl, 5 KCl, 2 CaCl<sub>2</sub>, 2 MgCl<sub>2</sub>, 10 glucose, 10 Hepes (pH 7.4, ~310 mOsm) and  
636 subsequently frozen with a Leica EM ICE high-pressure freezer at DIV15-17. After freeze  
637 substitution (in acetone containing 1% osmium tetroxide, 1% glutaraldehyde, and 1% H<sub>2</sub>O),  
638 samples were embedded in epoxy resin and sectioned at 50 nm with a Leica EM UC7  
639 ultramicrotome. Samples were imaged with a JEOL 1200EX transmission electron microscope  
640 equipped with an AMT 2k CCD camera. Images were analyzed using SynapseEM, a MATLAB  
641 macro provided by Dr. Matthijs Verhage. Bouton size was calculated from the perimeter of each  
642 synapse. Docked vesicles were defined as vesicles touching the presynaptic plasma membrane  
643 (with no space between the electron-dense vesicular and target membranes) opposed to the  
644 PSD. All data were acquired and analyzed by an experimenter blind to the genotype.

645

### 646 **Correlative light-electron microscopy**

647 HEK293T cells were grown on photo etched gridded coverslip and fixed 12 – 16 h after

648 transfection in 2.5% glutaraldehyde, 2% sucrose, 50 mM KCl, 2.5 mM MgCl<sub>2</sub>, 2.5 mM CaCl<sub>2</sub> and  
649 50 mM cacodylate (pH 7.4) for 2 h 4 °C. A spinning disk confocal microscope (3i, Denver,  
650 Colorado) equipped with an oil-immersion 63X 1.4 N.A. objective and 488/561 nm lasers was  
651 used for the acquisition of fluorescent images. After image acquisition, samples were stained for  
652 2 h in staining solution I (SSI; consisting of 1% OsO<sub>4</sub>, 1.25% potassium hexacyanoferrate in  
653 100 mM PIPES, pH 7.4.), followed by staining solution II (prepared by diluting 100 times SSI in  
654 1% tannic acid) for 30 min, and incubated in 1% uranyl acetate overnight. All staining steps were  
655 done on ice, the sample was protected from light, and three 5-minute washes with ice-cold milli-  
656 Q water were performed between steps. Samples were dehydrated with increasing ethanol  
657 concentrations (30%, 50%, 70%, 90%, 100%), followed by two washes in 100% acetone,  
658 embedded in epoxy resin, baked at 60 °C for at least 36 h and sectioned at 50 nm with a Leica  
659 EM UC7 ultramicrotome. A JEOL 1200EX transmission electron microscope equipped with an  
660 AMT 2k CCD camera was used for electron image acquisition. Fluorescent and electron  
661 microscopy images were aligned using the BigWarp plugin (ImageJ) using the electron  
662 micrograph as a fixed image and different arbitrary references for alignment. As references, cell  
663 features such as the nucleus and the plasma membrane and the fluorescent signals were used.  
664 Multiple independent alignments using different references were conducted to confirm correct  
665 alignment.

666

## 667 **Electrophysiology**

668 Electrophysiological recordings were performed as described before<sup>19,34</sup>. DIV15 – 16 neurons  
669 were recorded in whole-cell patch-clamp configuration at room temperature in extracellular  
670 solution containing (in mM) 140 NaCl, 5 KCl, 1.5 CaCl<sub>2</sub>, 2 MgCl<sub>2</sub>, 10 HEPES (pH 7.4) and 10  
671 Glucose. Glass pipettes were pulled at 2 – 4 MΩ and filled with intracellular solutions containing  
672 (in mM) 120 Cs-methanesulfonate, 10 EGTA, 2 MgCl<sub>2</sub>, 10 HEPES-CsOH (pH 7.4), 4 Na<sub>2</sub>-ATP,  
673 and 1 Na-GTP for excitatory transmission; and 40 CsCl, 90 K-Gluconate, 1.8 NaCl, 1.7 MgCl<sub>2</sub>,

674 3.5 KCl, 0.05 EGTA, 10 HEPES, 2 MgATP, 0.4 Na<sub>2</sub>-GTP, 10 phosphocreatine, CsOH (pH 7.4)  
675 for inhibitory transmission. For evoked responses, 4 mM QX314-Cl was added to the  
676 intracellular solution to block sodium channels. Neurons were clamped at -70 mV for IPSC and  
677 AMPAR-EPSC recordings, or +40 mV for NMDA-EPSCs. Series resistance was compensated  
678 down to 5 – 5.5 MΩ. Recordings in which the series resistance increased to >15 MΩ before  
679 compensation were discarded. mEPSCs, mIPSCs and sucrose-evoked release were measured  
680 in extracellular solution supplemented with 1 mM TTX, 50 mM D-AP5 and either 20 mM  
681 picrotoxin (for EPSCs) or 20 mM CNQX (for IPSCs). 500 mM hypertonic sucrose was applied  
682 for 10 s, and the integral of the first 10 s of the response was used to estimate the RRP. Action  
683 potential-evoked responses were elicited by focal bipolar electrical stimulation with an electrode  
684 made from Nichrome wire and recorded in extracellular solution supplemented with 20 mM  
685 CNQX and either 50 mM D-AP5 (for IPSCs) or 20 mM PTX (for NMDAR-EPSCs). A Multiclamp  
686 700B amplifier and a Digidata 1550 digitizer were used for data acquisition, sampling at 10 kHz  
687 and filtering at 2 kHz. Data were analyzed using pClamp. In all experiments, the experimenter  
688 was blind to the condition throughout data acquisition and analyses.

689

## 690 **Statistics**

691 Normality and homogeneity of variances were assessed using Shapiro or Levene's tests,  
692 respectively. When test assumptions were met, parametric tests (t-test or one-way ANOVA)  
693 were used. Otherwise, the non-parametric tests (Mann-Whitney U or Kruskal-Wallis) were used.  
694 For paired pulse ratios, a two-way ANOVA was used. Tukey-Kramer or Holm corrections for  
695 multiple testing were applied for parametric and non-parametric post-hoc testing. All data were  
696 analyzed by an experimenter blind to the drug condition or genotype. For each dataset, the  
697 specific tests used are stated in the figure legend.

698

699 **References**

- 700 1. Banani, S. F., Lee, H. O., Hyman, A. A. & Rosen, M. K. Biomolecular condensates:  
701 organizers of cellular biochemistry. *Nat. Rev. Mol. Cell Biol.* **18**, 285–298 (2017).
- 702 2. Boeynaems, S. *et al.* Protein Phase Separation: A New Phase in Cell Biology. *Trends*  
703 *Cell Biol.* **28**, 420–435 (2018).
- 704 3. Chen, X., Wu, X., Wu, H. & Zhang, M. Phase separation at the synapse. *Nat. Neurosci.*  
705 **23**, 301–310 (2020).
- 706 4. Emperador-Melero, J. & Kaeser, P. S. Assembly of the presynaptic active zone. *Curr.*  
707 *Opin. Neurobiol.* **63**, 95–103 (2020).
- 708 5. Südhof, T. C. The Presynaptic Active Zone. *Neuron* **75**, 11–25 (2012).
- 709 6. Wu, X. *et al.* RIM and RIM-BP Form Presynaptic Active-Zone-like Condensates via  
710 Phase Separation. *Mol. Cell* **73**, 971-984.e5 (2019).
- 711 7. Milovanovic, D., Wu, Y., Bian, X. & De Camilli, P. A liquid phase of synapsin and lipid  
712 vesicles. *Science* **361**, 604–607 (2018).
- 713 8. Zeng, M. *et al.* Phase Transition in Postsynaptic Densities Underlies Formation of  
714 Synaptic Complexes and Synaptic Plasticity. *Cell* **166**, 1163-1175.e12 (2016).
- 715 9. Kaufmann, N., DeProto, J., Ranjan, R., Wan, H. & Van Vactor, D. Drosophila liprin-alpha  
716 and the receptor phosphatase Dlar control synapse morphogenesis. *Neuron* **34**, 27–38  
717 (2002).
- 718 10. Zhen, M. & Jin, Y. The liprin protein SYD-2 regulates the differentiation of presynaptic  
719 termini in *C. elegans*. *Nature* **401**, 371–375 (1999).
- 720 11. Patel, M. R. *et al.* Hierarchical assembly of presynaptic components in defined *C. elegans*  
721 synapses. *Nat. Neurosci.* **9**, 1488–1498 (2006).
- 722 12. Dai, Y. *et al.* SYD-2 Liprin-alpha organizes presynaptic active zone formation through  
723 ELKS. *Nat. Neurosci.* **9**, 1479–1487 (2006).
- 724 13. Serra-Pages, C., Medley, Q. G., Tang, M., Hart, A. & Streuli, M. Liprins, a family of LAR

- 725 transmembrane protein-tyrosine phosphatase-interacting proteins. *J. Biol. Chem.* **273**,  
726 15611–15620 (1998).
- 727 14. Serra-Pagès, C. *et al.* The LAR transmembrane protein tyrosine phosphatase and a  
728 coiled-coil LAR-interacting protein co-localize at focal adhesions. *EMBO J.* **14**, 2827–  
729 2838 (1995).
- 730 15. Zürner, M. & Schoch, S. The mouse and human Liprin-alpha family of scaffolding  
731 proteins: genomic organization, expression profiling and regulation by alternative splicing.  
732 *Genomics* **93**, 243–253 (2009).
- 733 16. Wong, M. Y. *et al.* Liprin- $\alpha$ 3 controls vesicle docking and exocytosis at the active zone of  
734 hippocampal synapses. *Proc. Natl. Acad. Sci.* **115**, 2234–2239 (2018).
- 735 17. Spangler, S. A. *et al.* Liprin-alpha2 promotes the presynaptic recruitment and turnover of  
736 RIM1/CASK to facilitate synaptic transmission. *J. Cell Biol.* **201**, 915–928 (2013).
- 737 18. Choe, K.-M., Prakash, S., Bright, A. & Clandinin, T. R. Liprin-alpha is required for  
738 photoreceptor target selection in *Drosophila*. *Proc. Natl. Acad. Sci. U. S. A.* **103**, 11601–  
739 11606 (2006).
- 740 19. Wang, S. S. H. *et al.* Fusion Competent Synaptic Vesicles Persist upon Active Zone  
741 Disruption and Loss of Vesicle Docking. *Neuron* **91**, 777–791 (2016).
- 742 20. Acuna, C., Liu, X. & Südhof, T. C. How to Make an Active Zone: Unexpected Universal  
743 Functional Redundancy between RIMs and RIM-BPs. *Neuron* **91**, 792–807 (2016).
- 744 21. Sakamoto, S. *et al.* Liprin-alpha controls stress fiber formation by binding to mDia and  
745 regulating its membrane localization. *J. Cell Sci.* **125**, 108–120 (2012).
- 746 22. Miller, K. E. *et al.* Direct observation demonstrates that Liprin-alpha is required for  
747 trafficking of synaptic vesicles. *Curr. Biol.* **15**, 684–689 (2005).
- 748 23. Ko, J. *et al.* Interaction between liprin-alpha and GIT1 is required for AMPA receptor  
749 targeting. *J. Neurosci.* **23**, 1667–1677 (2003).
- 750 24. Ko, J., Na, M., Kim, S., Lee, J. R. & Kim, E. Interaction of the ERC family of RIM-binding

- 751 proteins with the liprin-alpha family of multidomain proteins. *J. Biol. Chem.* **278**, 42377–  
752 42385 (2003).
- 753 25. Schoch, S. *et al.* RIM1alpha forms a protein scaffold for regulating neurotransmitter  
754 release at the active zone. *Nature* **415**, 321–326 (2002).
- 755 26. Serra-Pagès, C., Streuli, M. & Medley, Q. G. Liprin phosphorylation regulates binding to  
756 LAR: Evidence for liprin autophosphorylation. *Biochemistry* **44**, 15715–15724 (2005).
- 757 27. de Jong, A. P. & Verhage, M. Presynaptic signal transduction pathways that modulate  
758 synaptic transmission. *Curr. Opin. Neurobiol.* **19**, 245–253 (2009).
- 759 28. Zeng, M. *et al.* Reconstituted Postsynaptic Density as a Molecular Platform for  
760 Understanding Synapse Formation and Plasticity. *Cell* **174**, 1172-1187.e16 (2018).
- 761 29. Deng, L., Kaeser, P. S., Xu, W. & Südhof, T. C. RIM Proteins Activate Vesicle Priming by  
762 Reversing Autoinhibitory Homodimerization of Munc13. *Neuron* **69**, 317–331 (2011).
- 763 30. Ashery, U. *et al.* Munc13-1 acts as a priming factor for large dense-core vesicles in  
764 bovine chromaffin cells. *EMBO J.* **19**, 3586–3596 (2000).
- 765 31. Lackner, M. R., Nurrish, S. J. & Kaplan, J. M. Facilitation of synaptic transmission by  
766 EGL-30 Gqalpha and EGL-8 PLCbeta: DAG binding to UNC-13 is required to stimulate  
767 acetylcholine release. *Neuron* **24**, 335–346 (1999).
- 768 32. Nyitrai, H., Wang, S. S. H. & Kaeser, P. S. ELKS1 Captures Rab6-Marked Vesicular  
769 Cargo in Presynaptic Nerve Terminals. *Cell Rep.* **31**, 107712 (2020).
- 770 33. de Jong, A. P. H. *et al.* RIM C2B Domains Target Presynaptic Active Zone Functions to  
771 PIP2-Containing Membranes. *Neuron* **98**, 335-349.e7 (2018).
- 772 34. Held, R. G. *et al.* Synapse and Active Zone Assembly in the Absence of Presynaptic  
773 Ca<sup>2+</sup> Channels and Ca<sup>2+</sup> Entry. *Neuron* **107**, 667-683.e9 (2020).
- 774 35. Zürner, M., Mittelstaedt, T., tom Dieck, S., Becker, A. & Schoch, S. Analyses of the  
775 spatiotemporal expression and subcellular localization of liprin- $\alpha$  proteins. *J. Comp.*  
776 *Neurol.* **519**, 3019–3039 (2011).



- 777 36. Zucker, R. S. & Regehr, W. G. Short-term synaptic plasticity. *Annu. Rev. Physiol.* **64**,  
778 355–405 (2002).
- 779 37. Kaeser, P. S. & Regehr, W. G. The readily releasable pool of synaptic vesicles. *Curr.*  
780 *Opin. Neurobiol.* **43**, 63–70 (2017).
- 781 38. Rhee, J. S. *et al.* Beta phorbol ester- and diacylglycerol-induced augmentation of  
782 transmitter release is mediated by Munc13s and not by PKCs. *Cell* **108**, 121–133 (2002).
- 783 39. Wierda, K. D., Toonen, R. F., de Wit, H., Brussaard, A. B. & Verhage, M.  
784 Interdependence of PKC-dependent and PKC-independent pathways for presynaptic  
785 plasticity. *Neuron* **54**, 275–290 (2007).
- 786 40. de Jong, A. P. H. *et al.* Phosphorylation of synaptotagmin-1 controls a post-priming step  
787 in PKC-dependent presynaptic plasticity. *Proc. Natl. Acad. Sci. U. S. A.* **113**, 5095–5100  
788 (2016).
- 789 41. Spangler, S. A. *et al.* Differential expression of liprin- $\alpha$  family proteins in the brain  
790 suggests functional diversification. *J. Comp. Neurol.* **519**, 3040–3060 (2011).
- 791 42. Hoogenraad, C. C. *et al.* Liprin $\alpha$ 1 Degradation by Calcium/Calmodulin-Dependent  
792 Protein Kinase II Regulates LAR Receptor Tyrosine Phosphatase Distribution and  
793 Dendrite Development. *Dev. Cell* **12**, 587–602 (2007).
- 794 43. Kaeser, P. S. *et al.* RIM proteins tether Ca<sup>2+</sup> channels to presynaptic active zones via a  
795 direct PDZ-domain interaction. *Cell* **144**, 282–95 (2011).
- 796 44. Rebola, N. *et al.* Distinct Nanoscale Calcium Channel and Synaptic Vesicle Topographies  
797 Contribute to the Diversity of Synaptic Function. *Neuron* **104**, 693-710.e9 (2019).
- 798 45. Sakamoto, H. *et al.* Synaptic weight set by Munc13-1 supramolecular assemblies. *Nat.*  
799 *Neurosci.* **21**, 41–49 (2018).
- 800 46. Reddy-Alla, S. *et al.* Stable Positioning of Unc13 Restricts Synaptic Vesicle Fusion to  
801 Defined Release Sites to Promote Synchronous Neurotransmission. *Neuron* **95**, 1350-  
802 1364.e12 (2017).

- 803 47. Han, Y., Kaeser, P. S., Südhof, T. C. & Schneggenburger, R. RIM Determines Ca<sup>2+</sup>  
804 Channel Density and Vesicle Docking at the Presynaptic Active Zone. *Neuron* **69**, 304–  
805 316 (2011).
- 806 48. Gracheva, E. O., Hadwiger, G., Nonet, M. L. & Richmond, J. E. Direct interactions  
807 between *C. elegans* RAB-3 and Rim provide a mechanism to target vesicles to the  
808 presynaptic density. *Neurosci Lett* **444**, 137–142 (2008).
- 809 49. Müller, M., Liu, K. S. Y., Sigrist, S. J. & Davis, G. W. RIM controls homeostatic plasticity  
810 through modulation of the readily-releasable vesicle pool. *J. Neurosci.* **32**, 16574–16585  
811 (2012).
- 812 50. Koushika, S. P. *et al.* A post-docking role for active zone protein Rim. *Nat. Neurosci.* **4**,  
813 997–1005 (2001).
- 814 51. Liu, K. S. Y. *et al.* RIM-Binding Protein, a Central Part of the Active Zone, Is Essential for  
815 Neurotransmitter Release. *Science* **334**, 1565–1569 (2011).
- 816 52. Grauel, M. K. *et al.* RIM-binding protein 2 regulates release probability by fine-tuning  
817 calcium channel localization at murine hippocampal synapses. *Proc. Natl. Acad. Sci.* **113**,  
818 11615–11620 (2016).
- 819 53. Kushibiki, Y., Suzuki, T., Jin, Y. & Taru, H. RIMB-1/RIM-Binding Protein and UNC-10/RIM  
820 Redundantly Regulate Presynaptic Localization of the Voltage-Gated Calcium Channel in  
821 *Caenorhabditis elegans*. *J. Neurosci.* **39**, 8617–8631 (2019).
- 822 54. Brockmann, M. M. *et al.* RIM-BP2 primes synaptic vesicles via recruitment of Munc13-1  
823 at hippocampal mossy fiber synapses. *Elife* **8**, (2019).
- 824 55. Held, R. G., Liu, C. & Kaeser, P. S. ELKS controls the pool of readily releasable vesicles  
825 at excitatory synapses through its N-terminal coiled-coil domains. *Elife* **5**, (2016).
- 826 56. Sclip, A. & Südhof, T. C. LAR receptor phospho-tyrosine phosphatases regulate NMDA-  
827 receptor responses. *Elife* **9**, (2020).
- 828 57. Chen, L. Y., Jiang, M., Zhang, B., Gokce, O. & Südhof, T. C. Conditional Deletion of All

- 829           Neurexins Defines Diversity of Essential Synaptic Organizer Functions for Neurexins.  
830           *Neuron* **94**, 611-625.e4 (2017).
- 831 58.    Li, P. *et al.* Phase transitions in the assembly of multivalent signalling proteins. *Nature*  
832           **483**, 336–340 (2012).
- 833 59.    Chia, P. H., Patel, M. R. & Shen, K. NAB-1 instructs synapse assembly by linking  
834           adhesion molecules and F-actin to active zone proteins. *Nat. Neurosci.* **15**, 234–242  
835           (2012).
- 836 60.    Patel, M. R. & Shen, K. RSY-1 is a local inhibitor of presynaptic assembly in *C. elegans*.  
837           *Science* **323**, 1500–1503 (2009).
- 838 61.    Sala, K. *et al.* The ERC1 scaffold protein implicated in cell motility drives the assembly of  
839           a liquid phase. *Sci. Rep.* **9**, 1–14 (2019).
- 840 62.    Liu, C. *et al.* The Active Zone Protein Family ELKS Supports Ca<sup>2+</sup> Influx at Nerve  
841           Terminals of Inhibitory Hippocampal Neurons. *J. Neurosci.* **34**, 12289–12303 (2014).
- 842 63.    Skarnes, W. C. *et al.* A conditional knockout resource for the genome-wide study of  
843           mouse gene function. *Nature* **474**, 337–342 (2011).
- 844 64.    Dymecki, S. M. Flp recombinase promotes site-specific DNA recombination in embryonic  
845           stem cells and transgenic mice. *Proc. Natl. Acad. Sci. U. S. A.* **93**, 6191–6196 (1996).
- 846
- 847

848 **Figures**

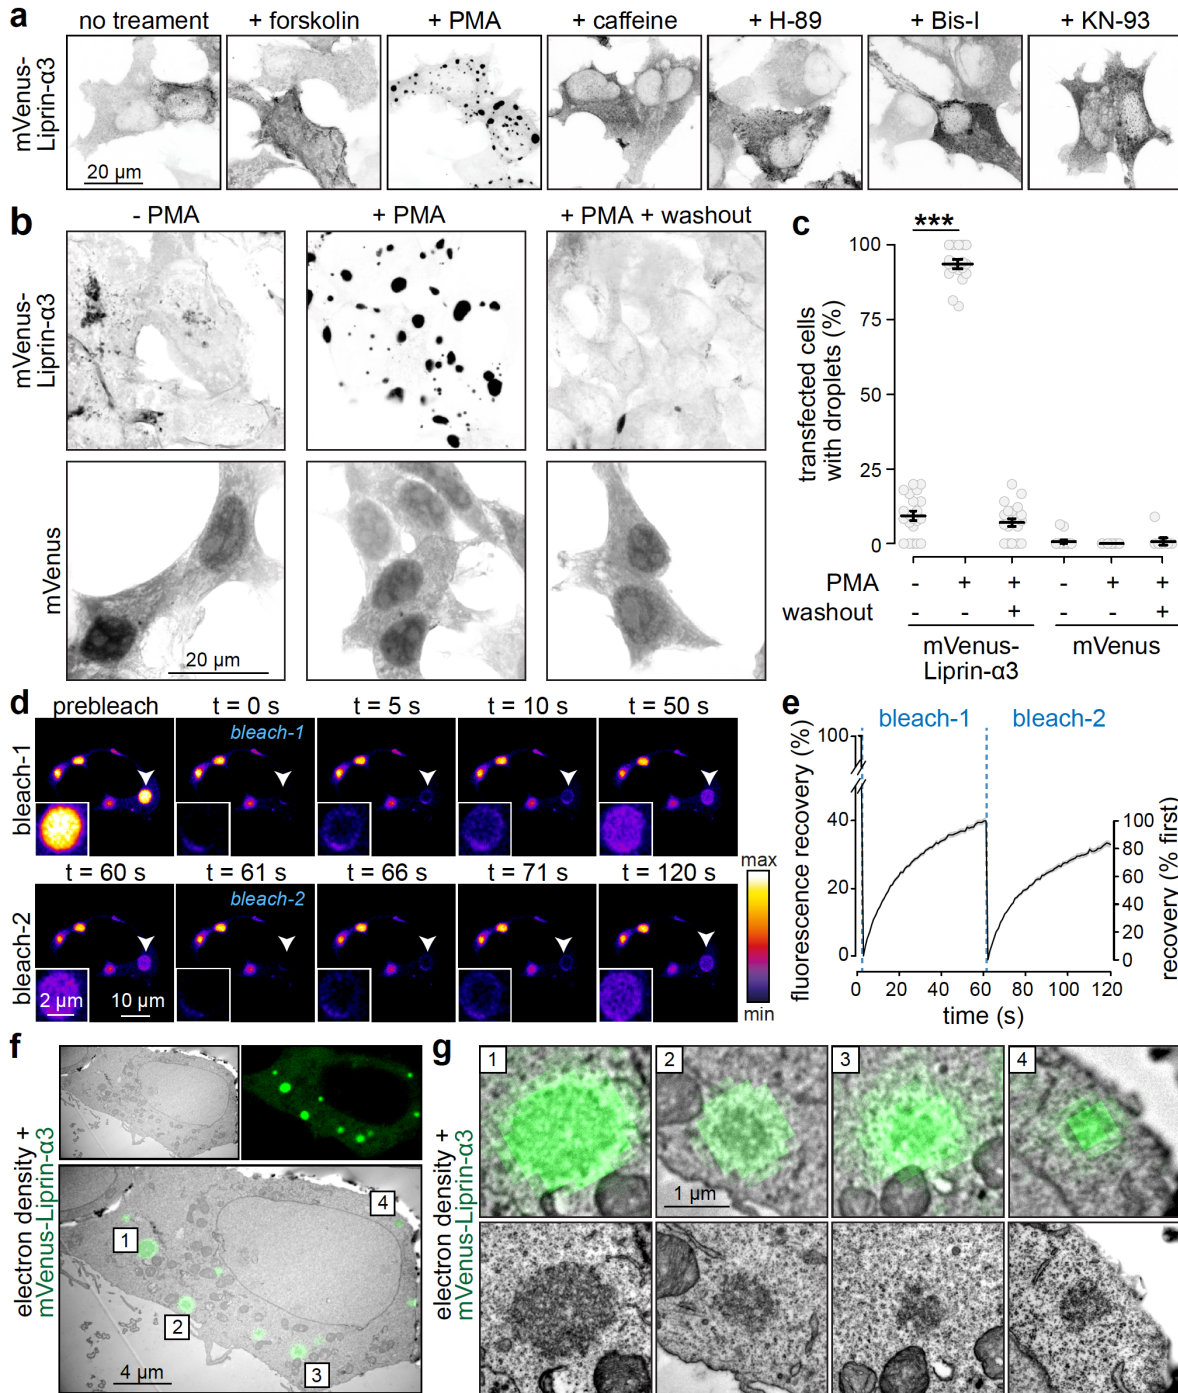

849

850 **Figure 1. Liprin-α3 forms electron-dense condensates via liquid-liquid phase separation**

851 **upon mimicking PLC/PKC activation**

852 **(a)** Confocal images of HEK293T cells transfected with mVenus-Liprin-α3, without treatment or

853 in the presence of forskolin (to activate PKA), PMA (to activate PLC/PKC), caffeine (to activate  
854 CamKII), H-89 (to inhibit PKA), bisindolylmaleimide-I (to inhibit PKC), or KN-93 (to inhibit  
855 CamKII).

856 **(b, c)** Example confocal images (b) and quantification of the percent cells containing droplets (c)  
857 of HEK293T cells transfected with mVenus-Liprin- $\alpha$ 3 or mVenus alone. Cells were fixed 15 min  
858 after PMA addition or six h after washout. N = 21 images/3 independent batches of cells each.

859 **(d, e)** Example time-lapse images (d) and quantification (e) of the fluorescence recovery after  
860 photobleaching (FRAP) of mVenus-Liprin- $\alpha$ 3 condensates. Two consecutive bleach steps were  
861 applied. N = 30 droplets/3 independent transfections.

862 **(f, g)** Correlative light-electron microscopy (CLEM) example images of a HEK293T cell  
863 transfected with mVenus-Liprin- $\alpha$ 3 and incubated with PMA showing an overview with multiple  
864 condensates (f) and detailed individual droplets (g) magnified from the overview image (top) and  
865 independently acquired higher magnification images of the same droplets (bottom).

866 Summary data in c, e and g are mean  $\pm$  SEM. \*\*\* p < 0.001 assessed by Kruskal-Wallis tests  
867 with Holm post-hoc comparison against the respective - PMA condition. For a time course of  
868 phase separation, phase separation of non-tagged Liprin- $\alpha$ 3 and liquid droplet fusion, see  
869 Extended Data Fig. 1 and Movie 1.

870

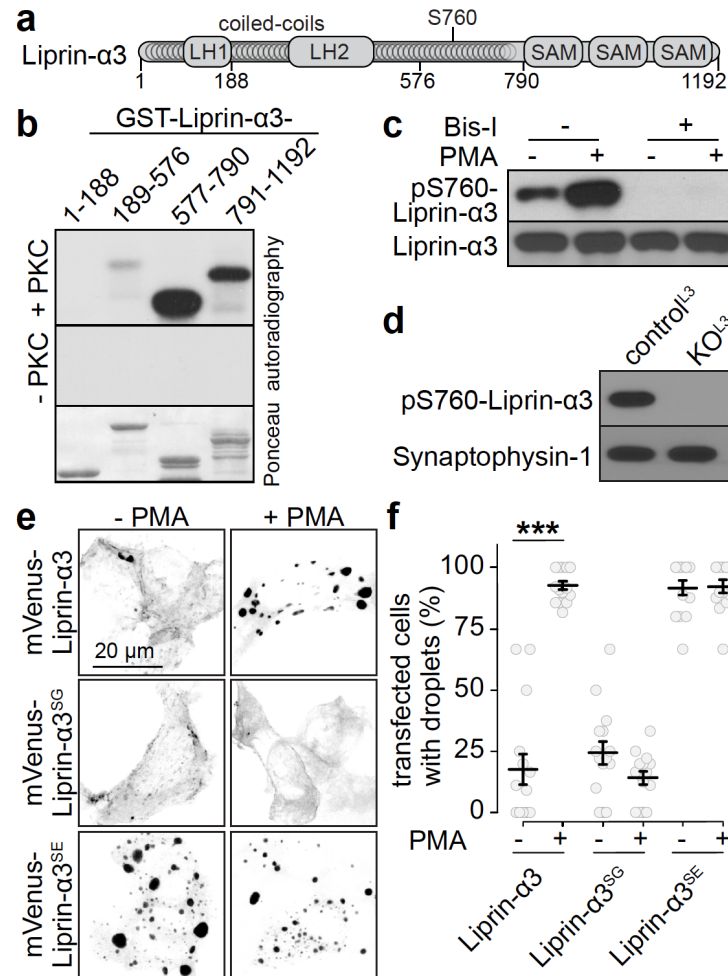

871

872 **Figure 2. Protein kinase C phosphorylation of Liprin-α3 at serine-760 induces phase**  
 873 **separation**

874 **(a)** Schematic of the Liprin-α3 domain structure showing Liprin homology regions 1 and 2 (LH-1  
 875 and -2), coiled-coil regions and sterile alpha motifs (SAM).

876 **(b)** Autoradiography (top, middle) and Ponceau staining (bottom) of purified GST-Liprin-α3  
 877 fragments incubated with <sup>32</sup>P-γ-ATP and recombinant PKC (top), or without PKC (middle).

878 **(c)** Western blot of lysates of transfected HEK293T cells expressing Liprin-α3 and incubated  
 879 with PMA and, where indicated, the PKC inhibitor bisindolylmaleimide-I (Bis-I), and  
 880 immunoblotted with newly generated anti-phospho-S760 Liprin-α3 or Liprin-α3 antibodies.

881 **(d)** Western blot of lysates of cultured hippocampal neurons from Liprin-α3 knockout mice  
 882 (KO<sup>L3</sup>) or from heterozygote control mice (control<sup>L3</sup>), with phospho-S760 Liprin-α3 antibodies.

883 **(e, f)** Example confocal images **(e)** and quantification **(f)** of droplet formation in HEK293T cells  
884 expressing mVenus-tagged wild type Liprin- $\alpha$ 3, phospho-dead Liprin- $\alpha$ 3 S760G (Liprin- $\alpha$ 3<sup>SG</sup>) or  
885 phospho-mimetic Liprin- $\alpha$ 3 S760E (Liprin- $\alpha$ 3<sup>SE</sup>). N = 15 images/3 independent transfections  
886 each.

887 Data in f are mean  $\pm$  SEM. \*\*\* p < 0.001 assessed by Kruskal-Wallis tests. For evaluation of  
888 additional potential phosphorylation sites, expression profile of phospho-S760 Liprin- $\alpha$ 3 across  
889 brain areas and development, and droplet formation of other Liprin- $\alpha$  isoforms, see Extended  
890 Data Fig. 2.

891

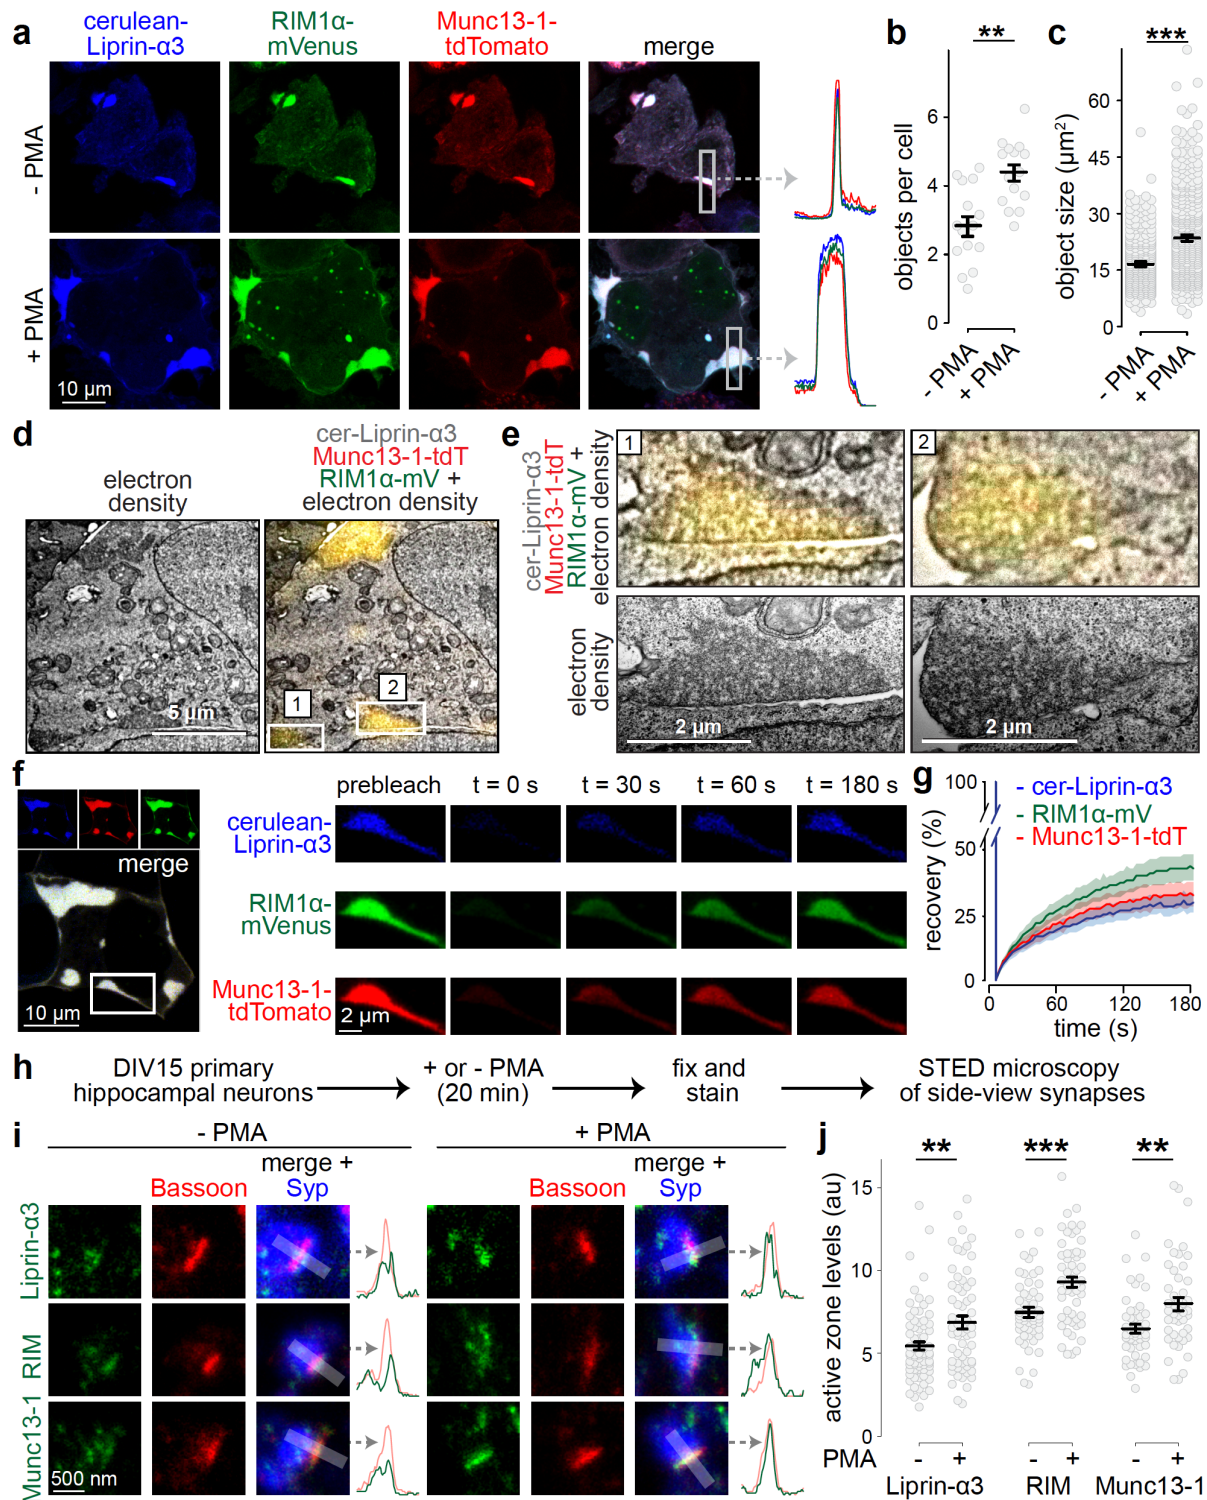

892

893

**Figure 3. Liprin- $\alpha$ 3, Munc13 and RIM are co-recruited into phase condensates at the**

894

**plasma membrane**

895

**(a-c)** Example confocal images including line profiles of highlighted regions (a) and



896 quantification (b) of phase condensates in HEK293T cells transfected with cerulean-Liprin- $\alpha$ 3,  
897 RIM1 $\alpha$ -mVenus and Munc13-1-tdTomato in the absence or presence of PMA. Quantification of  
898 the number (b) and size (c) of protein condensates is shown. N = 15 images/3 independent  
899 transfections.

900 **(d, e)** CLEM example images of a HEK293T cell transfected with cerulean-Liprin- $\alpha$ 3, RIM1 $\alpha$ -  
901 mVenus and Munc13-1-tdTomato and incubated with PMA showing an overview with multiple  
902 condensates (d) and detailed individual condensates (e) magnified from the overview image  
903 (top) and independently acquired images at higher magnification of the same droplets (bottom).

904 **(f, g)** Example of FRAP experiment (f) and quantification (g) of droplets in HEK293T cells  
905 transfected with cerulean-Liprin- $\alpha$ 3, RIM1 $\alpha$ -mVenus and Munc13-1-tdTomato. N = 20 droplets/3  
906 independent transfections.

907 **(h)** Schematic of the assessment of effects of PKC activation on active zone assembly.

908 **(i, j)** Example STED images (i) and quantification (j) of the intensity of endogenous Liprin- $\alpha$ 3,  
909 RIM and Munc13-1 at the active zone. Synapses in side-view were identified by the active zone  
910 marker Bassoon (imaged by STED microscopy) aligned at the edge of a synaptic vesicle cluster  
911 marked by Synaptophysin (Syp; imaged by confocal microscopy). An example intensity profile  
912 of the intensity of the protein of interest and Bassoon is shown on the right of each image set.  
913 Peak intensities were measured in intensity profiles and plotted in j. Liprin- $\alpha$ 3: N = 71  
914 synapses/3 independent cultures (- PMA) and 63/3 (+ PMA); RIM: N = 55/3 (- PMA) and 54/3 (+  
915 PMA); Munc13-1 N = 46/3 (- PMA) and 44/3 (+ PMA).

916 Data are shown as mean  $\pm$  SEM. \*\* p < 0.01, \*\*\* p < 0.001 assessed by Mann-Whitney rank  
917 sum tests in b, c and j. For assessment of single and double transfections, and FRAP without  
918 PMA treatment see Extended Data Fig. 3, for a description of STED analyses and peak  
919 positions for each protein, see Extended Data Fig. 4.

920

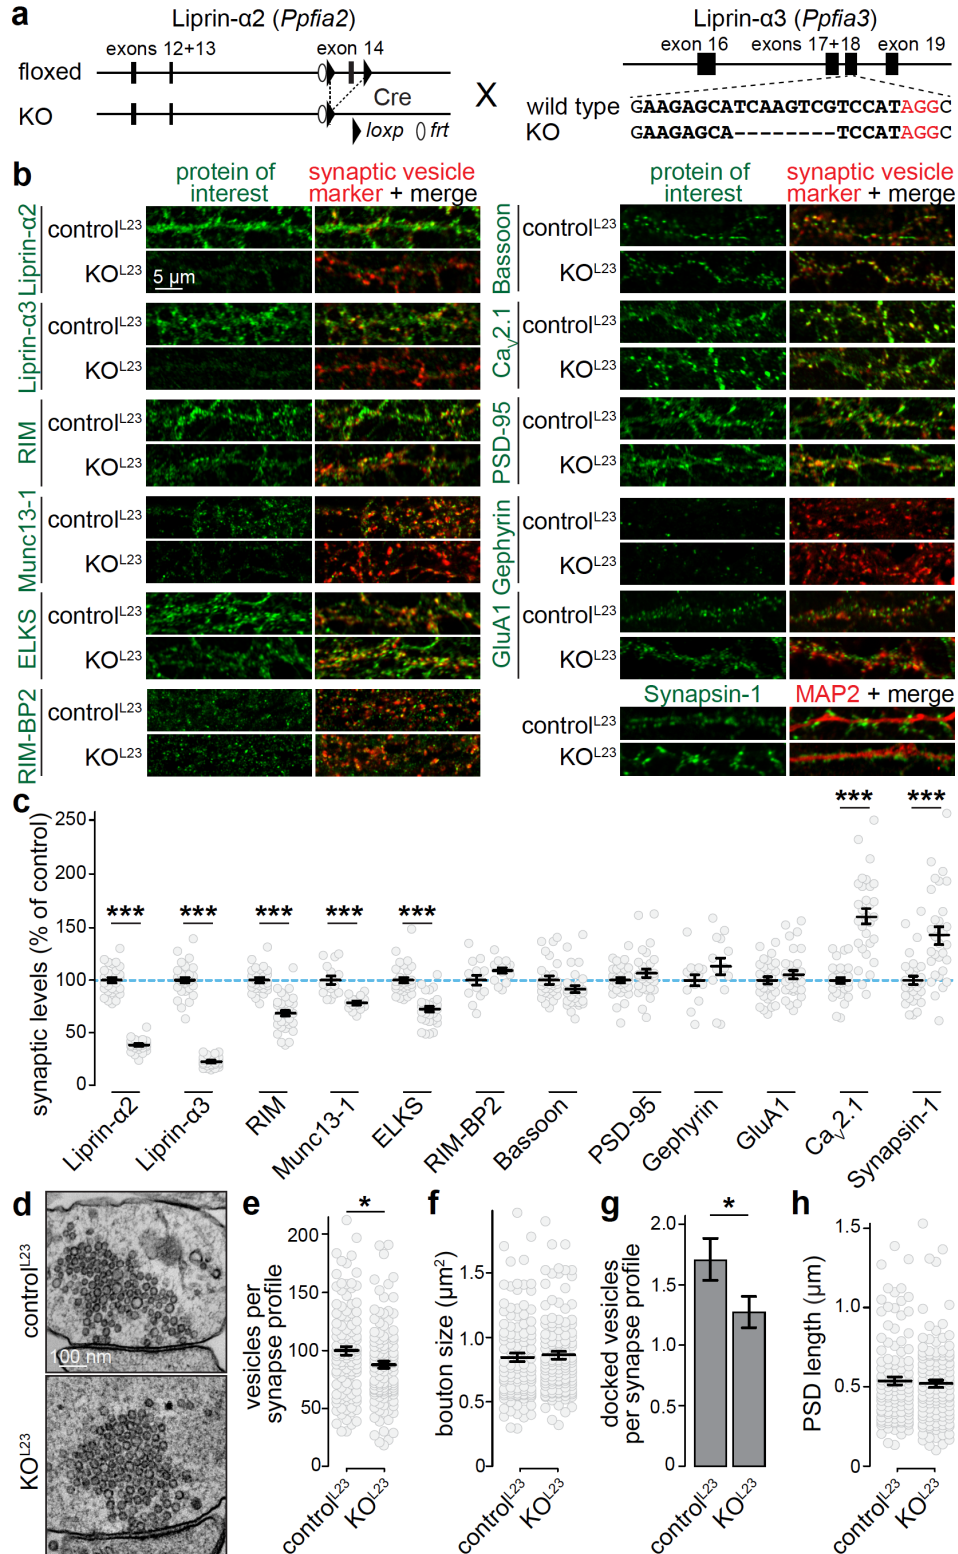

921

922 **Figure 4. Double Liprin-α2/α3 knockout alters presynaptic composition and ultrastructure**

923 **(a)** Schematic for simultaneous knockout of Liprin-α2 and -α3. Newly generated mice in which

924 Liprin- $\alpha$ 2 can be removed by cre recombination (Liprin- $\alpha$ 2<sup>ff</sup>) were crossed to previously  
925 published constitutive Liprin- $\alpha$ 3 knockout (Liprin- $\alpha$ 3<sup>-/-</sup>) mice that were generated by  
926 CRISPR/Cas9-mediated genome editing (deleted sequence is represented with dashes)<sup>16</sup>.  
927 Cultured hippocampal neurons of Liprin- $\alpha$ 2<sup>ff</sup>/Liprin- $\alpha$ 3<sup>-/-</sup> mice infected with lentivirus expressing  
928 cre recombinase were used to generate KO<sup>L23</sup> neurons, and neurons from Liprin- $\alpha$ 2<sup>ff</sup> x Liprin-  
929  $\alpha$ 3<sup>+/-</sup> mice infected with lentiviruses that express truncated, inactive cre recombinase were used  
930 to generate control<sup>L23</sup> neurons.

931 **(b, c)** Example confocal images (b) and quantification (c) of neurons immunostained for either  
932 Liprin- $\alpha$ 2, Liprin- $\alpha$ 3, RIM, Munc13-1, ELKS, RIM-BP2, Bassoon, Ca<sub>v</sub>2.1, PSD-95, Gephyrin or  
933 GluA1 and Synapsin (for Munc13-1, RIM-BP2 and Gephyrin) or Synaptophysin (all others) as  
934 vesicle marker, or Synapsin-1 and MAP2. Quantification in c was performed in regions of  
935 interest (ROIs) defined by the synaptic vesicle marker and normalized to the average control<sup>L23</sup>  
936 levels-per culture. N = 30 images/3 independent cultures per genotype per protein of interest,  
937 except for Munc13-1 and RIM-BP2 (N = 15/3) and Gephyrin (N = 14/3).

938 **(d-h)** Example electron micrographs of synapses (d) and quantification of the number of  
939 synaptic vesicles per section (e), bouton size (f), number of docked vesicles per section (g) and  
940 PSD length (h) of neurons fixed by high-pressure freezing followed by freeze substitution,  
941 control<sup>L23</sup>: N = 111 synapses/2 independent cultures, KO<sup>L23</sup>: N = 123/2.

942 All data are mean  $\pm$  SEM and were analyzed using Mann-Whitney U tests, except for PSD-95  
943 and Gephyrin in c, for which t-tests were used. \* p < 0.05, \*\*\* p < 0.001. For synaptic  
944 localization of Liprin- $\alpha$ 1- $\alpha$ 4 see Extended Data Fig. 5, generation of Liprin- $\alpha$ 2<sup>ff</sup> mice and  
945 analysis of Synaptophysin levels of the experiments shown in c see Extended Data Fig. 6, and  
946 for STED analysis of active zone localization of RIM, Munc13-1, RIM-BP2 and Ca<sub>v</sub>2.1 in KO<sup>L23</sup>  
947 neurons, see extended Data Fig. 7.

948

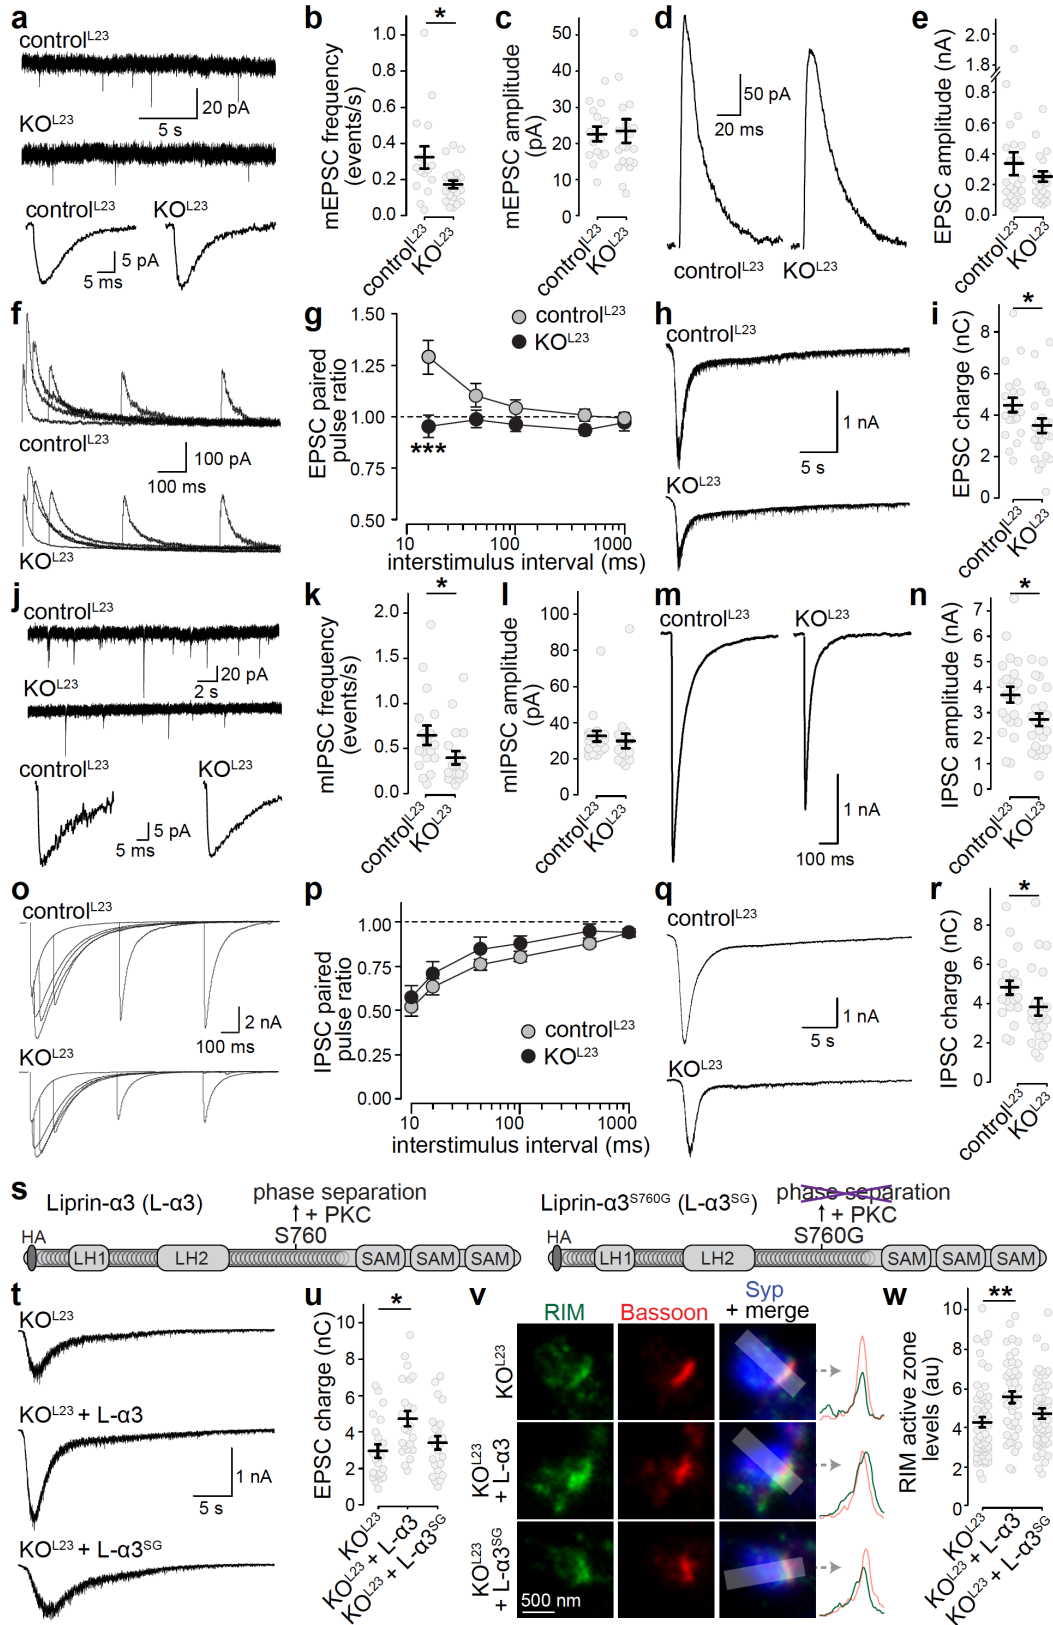

949

950

**Figure 5. Liprin-α2/α3 double knockout impairs neurotransmitter release**

951 **(a-c)** Example traces (a) of spontaneous miniature excitatory postsynaptic currents  
952 (mEPSC) recordings (top) and an averaged mEPSC of a single cell (bottom) and quantification  
953 of mEPSC frequency (b) and amplitude (c). For mEPSC frequency, control<sup>L23</sup>: N = 16 cells/3  
954 independent cultures, KO<sup>L23</sup>: N = 21/3. For amplitude, control<sup>L23</sup>: N = 15/3, KO<sup>L23</sup>: N = 20/3.  
955 **(d, e)** Example traces (d) and average amplitudes (e) of single action potential-evoked NMDA  
956 receptor-mediated EPSCs, control<sup>L23</sup>: N = 21/3, KO<sup>L23</sup>: N = 20/3.  
957 **(f, g)** Example traces (f) and average NMDA-EPSC paired pulse ratios (g, PPRs) at various  
958 interstimulus intervals, control<sup>L23</sup>: N = 21/3, KO<sup>L23</sup>: N = 20/3.  
959 **(h, i)** Example traces (h) and quantification (i) of the AMPA receptor-mediated EPSC charge in  
960 response to a local 10 s puff of 500 mOsm sucrose to estimate the RRP. control<sup>L23</sup>: N = 21/3,  
961 KO<sup>L23</sup>: N = 25/3.  
962 **(j-r)** Same as a-i, but for IPSCs, k+l: for mIPSC frequency, control<sup>L23</sup>: N = 18/3, KO<sup>L23</sup>: N = 18/3,  
963 for amplitude, control<sup>L23</sup>: N = 21/3, KO<sup>L23</sup>: N = 15/3; m + n: control<sup>L23</sup>: N = 23/3, KO<sup>L23</sup>: N = 24/3;  
964 o + p: control<sup>L23</sup>: N = 23/3, KO<sup>L23</sup>: N = 24/3, q + r: control<sup>L23</sup>: N = 22/3, KO<sup>L23</sup>: N = 22/3.  
965 **(s)** Diagram of the rescue experiment with Liprin- $\alpha$ 3 expression via lentiviral transduction.  
966 **(t, u)** Example traces (t) and quantification (u) of sucrose-triggered EPSCs, KO<sup>L23</sup>: N = 22/3,  
967 KO<sup>L23</sup> + Liprin- $\alpha$ 3 (L- $\alpha$ 3): N = 23/3, KO<sup>L23</sup> + Liprin- $\alpha$ 3<sup>S760G</sup> (L- $\alpha$ 3<sup>SG</sup>): N = 23/3.  
968 **(v, w)** Representative STED images (v) and quantification (w) of RIM at the active zone of side-  
969 view synapses as in Figs. 3i-3j. KO<sup>L23</sup>: N = 56 synapses/3 independent cultures, KO<sup>L23</sup> + L- $\alpha$ 3: N  
970 = 43/3, KO<sup>L23</sup> + L- $\alpha$ 3<sup>SG</sup>: N = 50/3.  
971 All data are mean  $\pm$  SEM, \* p < 0.05, \*\* p < 0.01 analyzed using Mann-Whitney U tests (b, c, i,  
972 k, l), t-tests (e, n, r), two-way ANOVA (g, p), or Kruskal-Wallis (u, w) with Tukey-kramer (g, p) or  
973 Holm (u, w) post-hoc comparison against KO<sup>L23</sup>. For a direct comparison of control<sup>L23</sup>, KO<sup>L23</sup> and  
974 KO<sup>L23</sup> + L- $\alpha$ 3 and for STED localization of rescue Liprin- $\alpha$ , see extended Data Fig. 8.

975

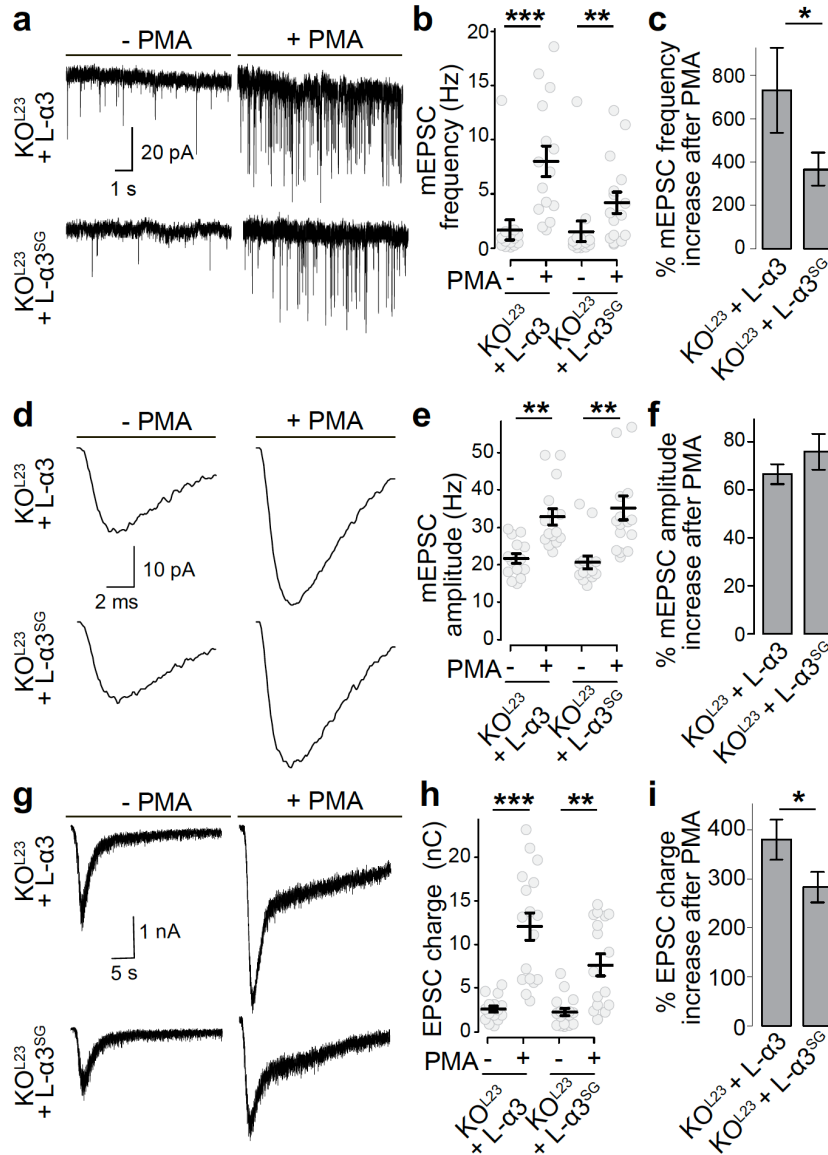

976

977 **Figure 6. PKC phosphorylation of Liprin- $\alpha3$  enhances synaptic vesicle release**

978 **(a-c)** Example traces (a) and quantification of mEPSC frequencies (b, c) in  $KO^{L23}$  neurons

979 rescued with wild type Liprin- $\alpha3$  (L- $\alpha3$ ) or non-phosphorylatable Liprin- $\alpha3$  S760G (L- $\alpha3^{SG}$ ) that

980 does not form phase condensates. The percent increase upon PMA addition over naïve

981 conditions per culture is shown in c.  $KO^{L23} + L-\alpha3$ : N = 14 cells/3 independent cultures (- PMA)

982 and 15/3 (+ PMA);  $KO^{L23} + L-\alpha3^{SG}$ : N = 14/3 (- PMA) and 16/3 (+ PMA).

983 **(d-f)** Average mEPSC from a single cell (d) and quantification of mEPSC amplitudes (e, f). N as

984 in b, c.

985 **(g-i)** Example traces (g) and quantification (h, i) of the EPSC charge in response to a local 10 s  
986 puff of 500 mOsm sucrose to estimate the RRP. KO<sup>L23</sup> + L- $\alpha$ 3: N = 15/3 (- PMA) and 17/3 (+  
987 PMA), KO<sup>L23</sup> + L- $\alpha$ 3<sup>SG</sup>: N = 17/3 (- PMA) and 17/3 (+ PMA).

988 All data are mean  $\pm$  SEM, \* p < 0.05, \*\* p < 0.01, \*\*\* p < 0.001 as analyzed by Kruskal-Wallis  
989 test and post-hoc (Holm) analysis versus the corresponding - PMA control (b, e, h) or a Mann-  
990 Whitney rank sum test (c, f, i).

991

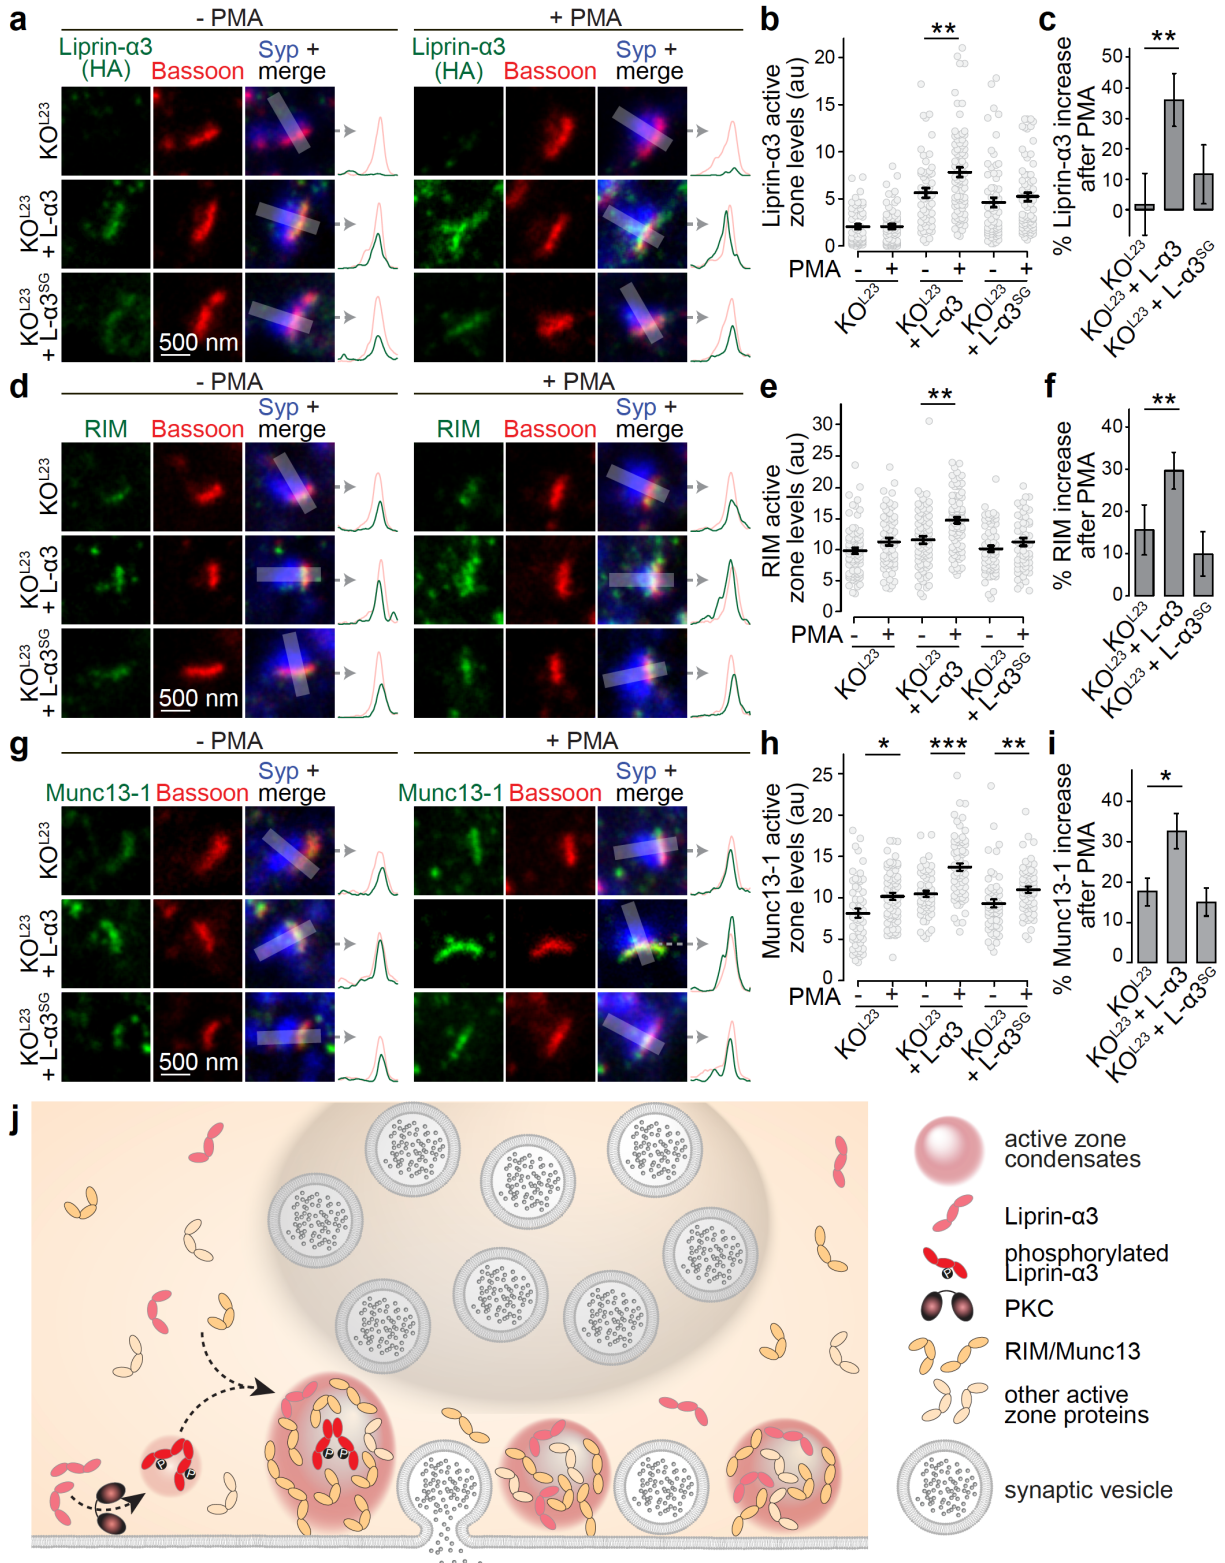

992

993

**Figure 7. The PKC phosphorylation site of Liprin- $\alpha$ 3 acutely modulates active zone**

994

**assembly**



995 **(a-c)** Example STED images and their intensity profiles (a) and quantification (b, c) of Liprin- $\alpha$ 3  
996 (detected by anti-HA antibodies) in side-view synapses in the presence or absence of PMA. The  
997 increase upon PMA addition normalized to corresponding - PMA controls is shown in c,  $KO^{L23}$ :  
998  $N = 70$  synapses/3 cultures (- PMA) and  $71/3$  (+ PMA),  $KO^{L23} + L-\alpha 3$ :  $N = 54/3$  (- PMA) and  
999  $83/3$  (+ PMA);  $KO^{L23} + L-\alpha 3^{SG}$ :  $N = 63/3$  (- PMA) and  $73/3$  (+ PMA).

1000 **(d-i)** Experiments as shown in in a-c, but for RIM (d-f) and Munc13-1 (g-h). RIM (d-f):  $KO^{L23}$ :  $N =$   
1001  $81/3$  (- PMA) and  $61/3$  (+ PMA),  $KO^{L23} + L-\alpha 3$ :  $N = 75/3$  (- PMA) and  $84/3$  (+ PMA);  $KO^{L23} + L-$   
1002  $\alpha 3^{SG}$ :  $N = 65/3$  (- PMA) and  $59/3$  (+ PMA). Munc13-1 (g-h):  $KO^{L23}$ :  $N = 54/3$  (- PMA) and  $67/3$  (+  
1003 PMA),  $KO^{L23} + L-\alpha 3$ :  $N = 55 /3$  (- PMA) and  $67/3$  (+ PMA),  $KO^{L23} + L-\alpha 3^{SG}$ :  $N = 57/3$  (- PMA) and  
1004  $62/3$  (+ PMA).

1005 **(j)** Working model for the control of active zone structure through phase separation of Liprin- $\alpha$ 3.  
1006 The formation of phase condensates is triggered by PKC phosphorylation of Liprin- $\alpha$ 3 at serine-  
1007 760 and Munc13-1 and RIM are recruited into these release site condensates for boosting  
1008 neurotransmitter secretion.

1009 Data are shown as mean  $\pm$  SEM, \*  $p < 0.05$ , \*\*  $p < 0.01$ , \*\*\*  $p < 0.001$  as analyzed by Kruskal-  
1010 Willis tests and post-hoc analysis (Holm) versus the corresponding - PMA control (b, e and h) or  
1011 versus  $KO^{L23}$  (c, f, and i).

1012

1013 Supplement

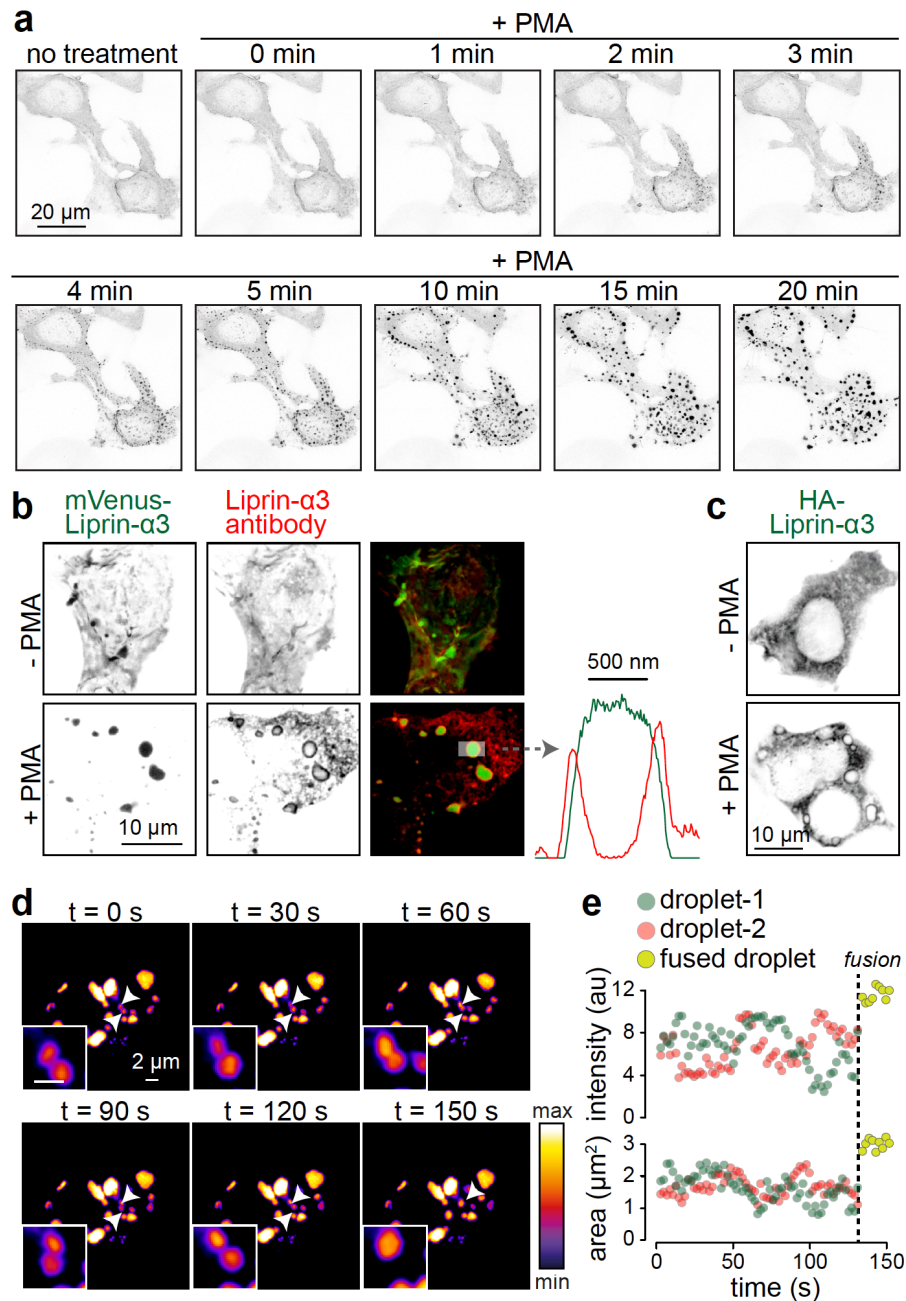

1014

1015 **Extended Data Figure 1. Liprin-α3 forms liquid-liquid phase condensates within minutes**

1016 **after activation of PKC**

1017 **(a)** Example confocal time-lapse images of HEK293T cells transfected with mVenus-Liprin-α3

1018 during PMA addition; also see Extended Data Movie 1.

1019 **(b)** Example confocal images and line profiles of HEK293T cells transfected with mVenus-

1020 Liprin- $\alpha$ 3 and immunostained for Liprin- $\alpha$ 3. A line profile of a Liprin- $\alpha$ 3 condensate is shown on  
1021 the right. Note that antibody staining produces ring-like shapes around mVenus-Liprin- $\alpha$ 3  
1022 fluorescence, likely because antibodies do not enter the phase condensates.

1023 **(c)** Example of HEK293T cells transfected with HA-Liprin- $\alpha$ 3 and immunostained for HA. Note  
1024 that ring-like structures were only present when PMA was added.

1025 **(d, e)** Time-lapse confocal images of two mVenus-Liprin- $\alpha$ 3 droplets undergoing a fusion  
1026 reaction (d), and measurement of the area and intensity of these condensates before and after  
1027 fusion (e).

1028

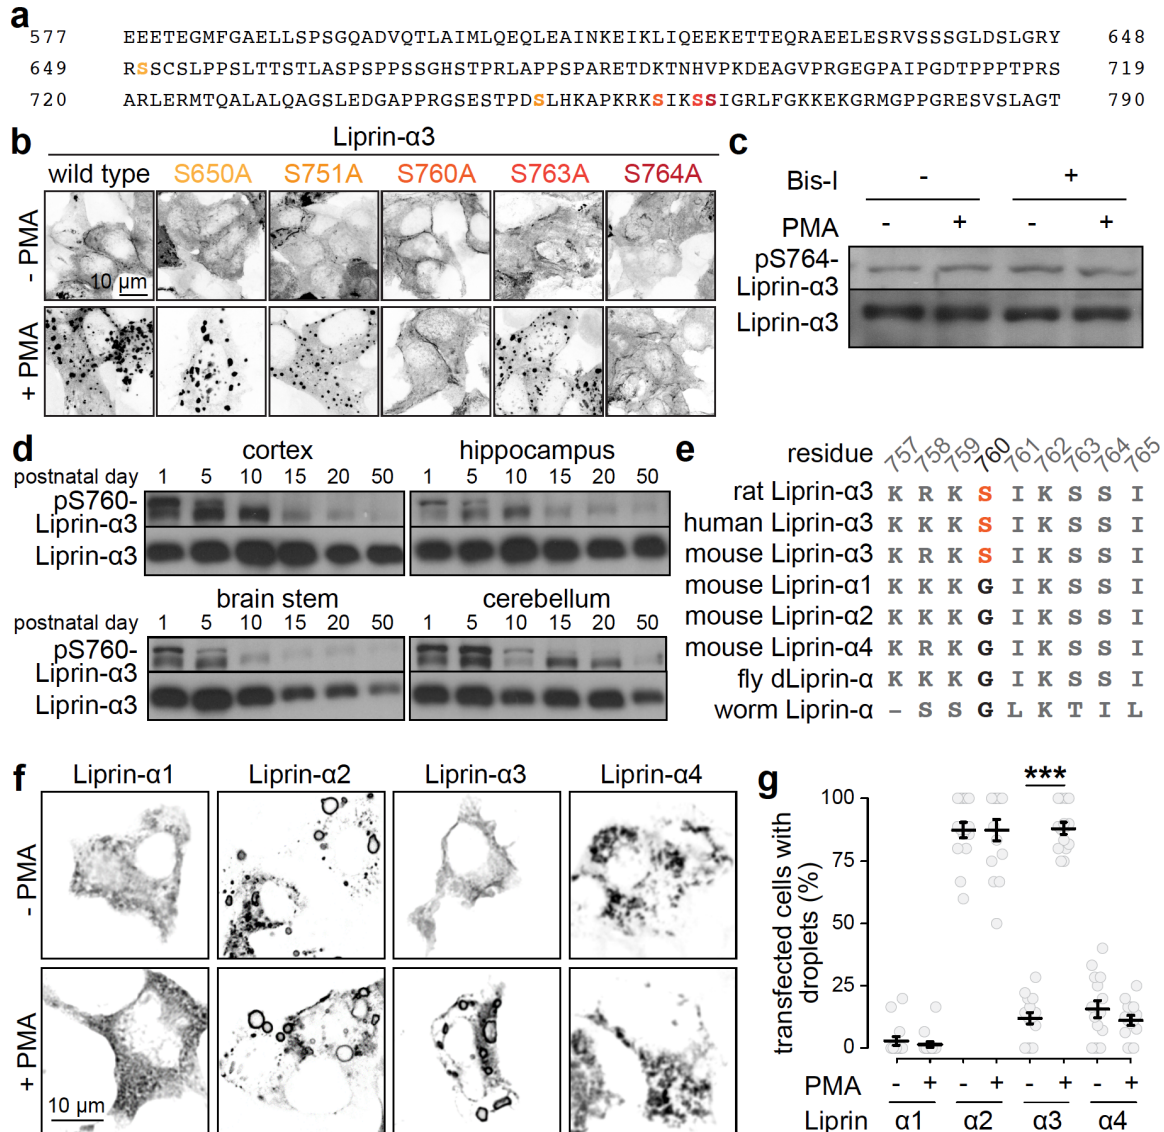

1029

1030

1031

1032

1033

1034

1035

1036

1037

## Extended Data Figure 2. Characterization of Liprin-α3 PKC phosphorylation in vitro and in vivo and assessment of other Liprin-α isoforms

(a) Amino acid sequence of the Liprin fragment that was highly phosphorylated. The serines identified by phospho-proteomic analyses are highlighted in a color code repeated in b.

(b) Confocal images of HEK293T cells transfected with mVenus-tagged Liprin-α3 or mVenus-Liprin-α3 containing point-mutations of each candidate amino acid residues potentially phosphorylated by PKC. Note that S760A and S764A abolish condensate formation upon PMA addition. All constructs contained single point mutations, except for the S650A construct, which

1038 also contained Y648A and S651A point mutations.

1039 **(c)** Western blot of HEK293T cell lysates transfected with Liprin- $\alpha$ 3 showing that activating or  
1040 blocking PKC phosphorylation does not change the signal detected by phospho-serine-764  
1041 specific Liprin- $\alpha$ 3 antibodies, and hence serine 764 is unlikely a substrate of PKC.

1042 **(d)** Western blots showing the expression profile of phospho-serine-760 Liprin- $\alpha$ 3 across brain  
1043 areas and development. Note the high expression levels during early postnatal days and  
1044 synaptogenesis.

1045 **(e)** Amino acid sequences of various Liprin- $\alpha$  isoforms around serine-760. The PKC  
1046 phosphorylation site is conserved in Liprin- $\alpha$ 3 among vertebrates, but absent in Liprin- $\alpha$ 1, - $\alpha$ 2  
1047 and - $\alpha$ 4 and in the single Liprin- $\alpha$  proteins expressed in *C. elegans* and *D. melanogaster*.

1048 **(f, g)** Example confocal images (f) and quantification (g) of HEK293T cells transfected with  
1049 Liprin- $\alpha$ 1, - $\alpha$ 2, - $\alpha$ 3 or - $\alpha$ 4 and immunostained for the respective Liprin isoform with or without  
1050 PMA. Of note, only the PKC-phosphorylatable Liprin- $\alpha$ 3 forms ring-like structures, indicative of  
1051 phase condensates, as a function of the presence of PMA, while Liprin- $\alpha$ 2 forms them  
1052 constitutively. Liprin- $\alpha$ 1 and Liprin- $\alpha$ 4 do not frequently form such structures. N = 15 images/3  
1053 independent transfections per condition.

1054 Data in g are mean  $\pm$  SEM, \*\*\* p < 0.001 as assessed by Kruskal-Wallis test with post-hoc Holm  
1055 tests against the corresponding - PMA control.

1056

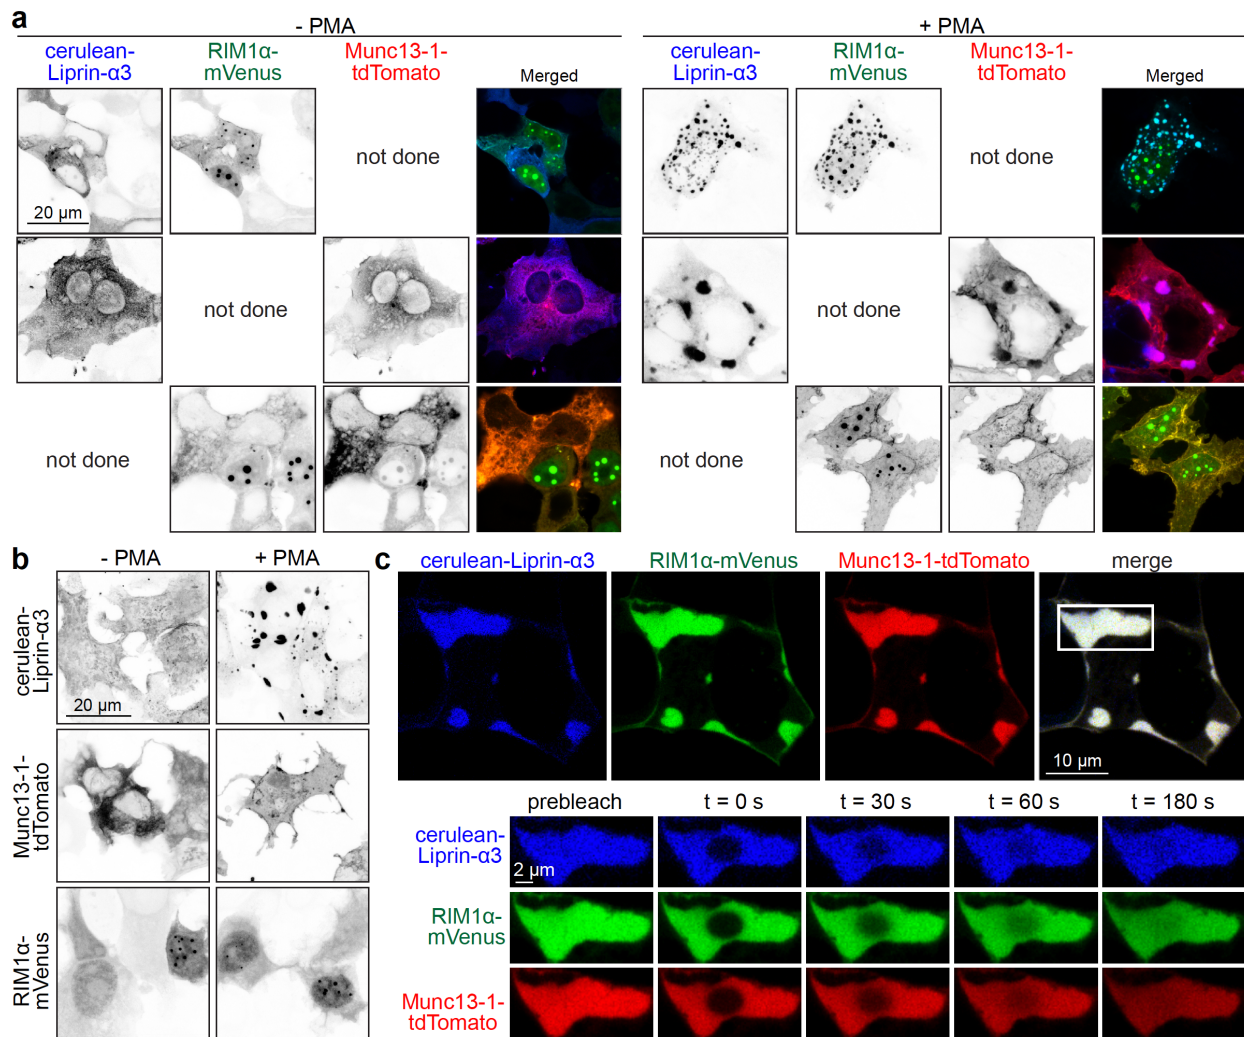

1057

1058

1059

1060

1061

1062

1063

1064

1065

1066

1067

### Extended Data Figure 3. Properties of droplets formed between Liprin- $\alpha$ 3, RIM1 and Munc13-1

(a, b) Example confocal images of HEK293T cells transfected with combinations of two cDNAs of cerulean-Liprin- $\alpha$ 3, RIM1 $\alpha$ -mVenus and Munc13-1-tdTomato (a) or with only one cDNA (b) in the presence or absence of PMA. Note that PMA only increases formation of large droplet-like condensates when Liprin- $\alpha$ 3 is expressed.

(c) Example FRAP experiment of a membrane-proximal condensate containing cerulean-Liprin- $\alpha$ 3, RIM1 $\alpha$ -mVenus and Munc13-1-tdTomato in transfected HEK293T cells in which only the center of the large condensate was photo-bleached. Note fast recovery of all three proteins, indicative of active internal protein rearrangement.

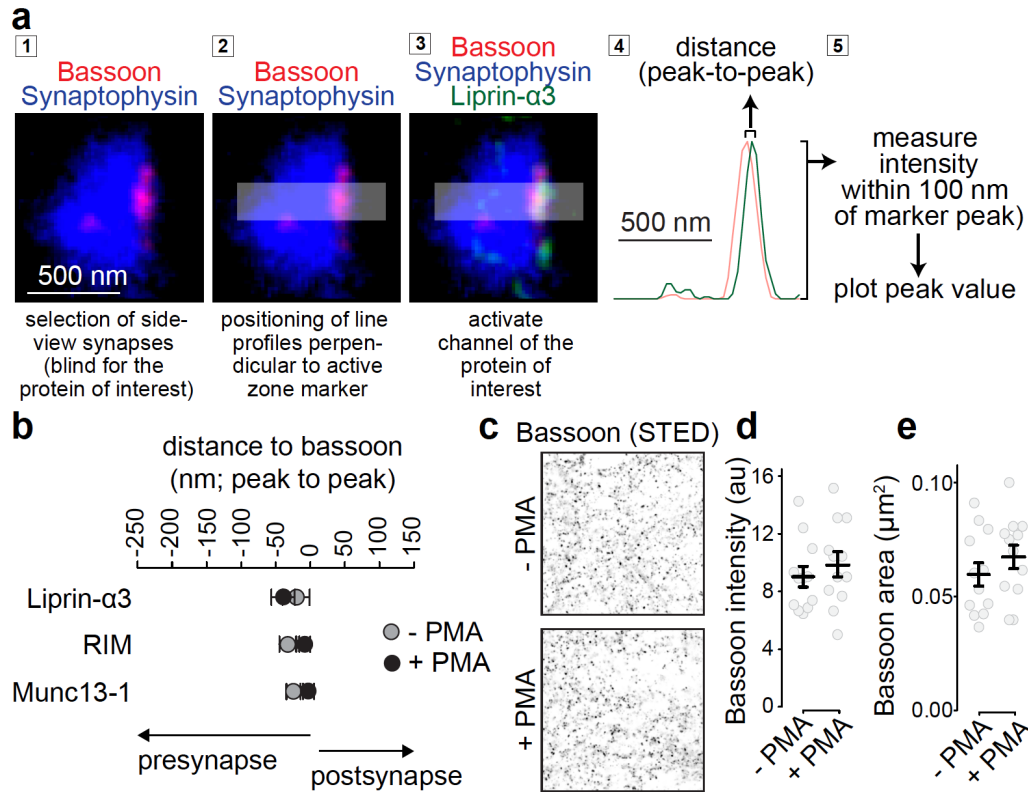

1068

1069 **Extended Data Figure 4. Workflow for STED side-view synapse analysis and peak**  
 1070 **position of active zone proteins**

1071 **(a)** Data analyses workflow for STED side-view synapses, showing an example STED image of  
 1072 a wild type side-view synapse immunostained for Bassoon and Liprin- $\alpha$ 3 (imaged in STED  
 1073 mode) and Synaptophysin (imaged in confocal mode).

1074 **(b)** Quantification of the average distance of the peak of Liprin- $\alpha$ 3, RIM and Munc13-1 of the  
 1075 experiment shown in Figs. 3i-3j to the peak of Bassoon. Liprin- $\alpha$ 3: N = 71 synapses/3  
 1076 independent cultures (- PMA) and 63/3 (+ PMA); RIM: N = 55/3 (-PMA) and 54/3 (+ PMA);  
 1077 Munc13-1 N = 46/3 (- PMA) and 44/3 (+ PMA).

1078 **(c-e)** Example Bassoon images (c) and quantification of the average intensity (d) and size (e) of  
 1079 Bassoon objects detected using automatic two-dimensional segmentation (size filter of 0.04-0.4  
 1080  $\mu\text{m}^2$  without considering the shape or orientation of the signal), N = 12 images/3 cultures per  
 1081 condition.

1082 Data are shown as mean  $\pm$  SEM, and Mann-Whitney rank sum test (b) or t-tests (d, e) were  
1083 used to assess significance.

1084



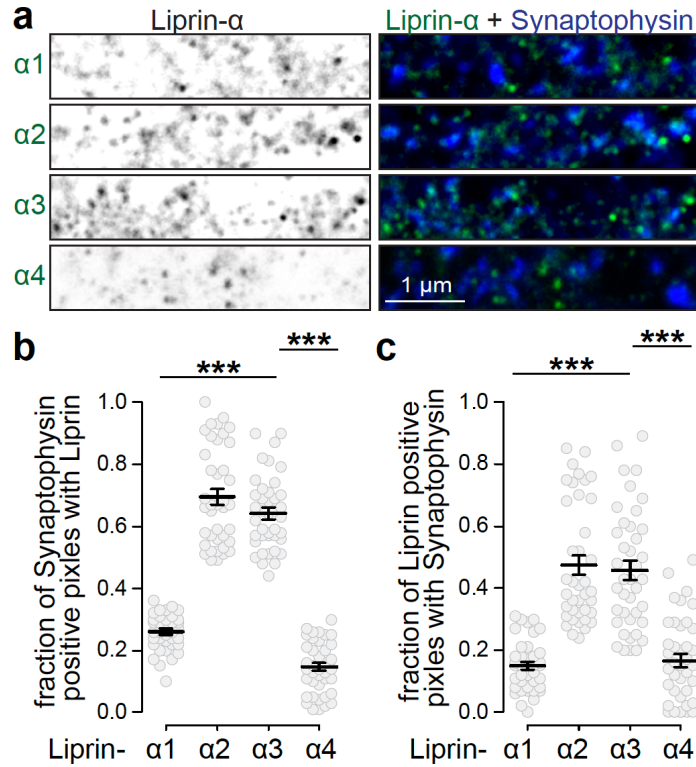

1085

1086 **Extended Data Figure 5. Synaptic expression of Liprin-α proteins**

1087 **(a)** Confocal images of wild type mouse hippocampal cultured neurons stained for  
1088 Synaptophysin and Liprin-α1, -α2, -α3 or -α4.

1089 **(b, c)** Mander's correlation for the fraction of Synaptophysin pixels positive for Liprin-α1, -α2, -α3  
1090 or -α4 (b), and vice versa (c). N = 39 images/3 independent cultures for Liprin-α1, -α2; N = 40/3  
1091 for Liprin-α3, -α4.

1092 Data are shown as mean ± SEM, \*\*\* p < 0.001 assessed by Kruskal-Wallis test followed by  
1093 posthoc Holm comparison against Liprin-α3.

1094

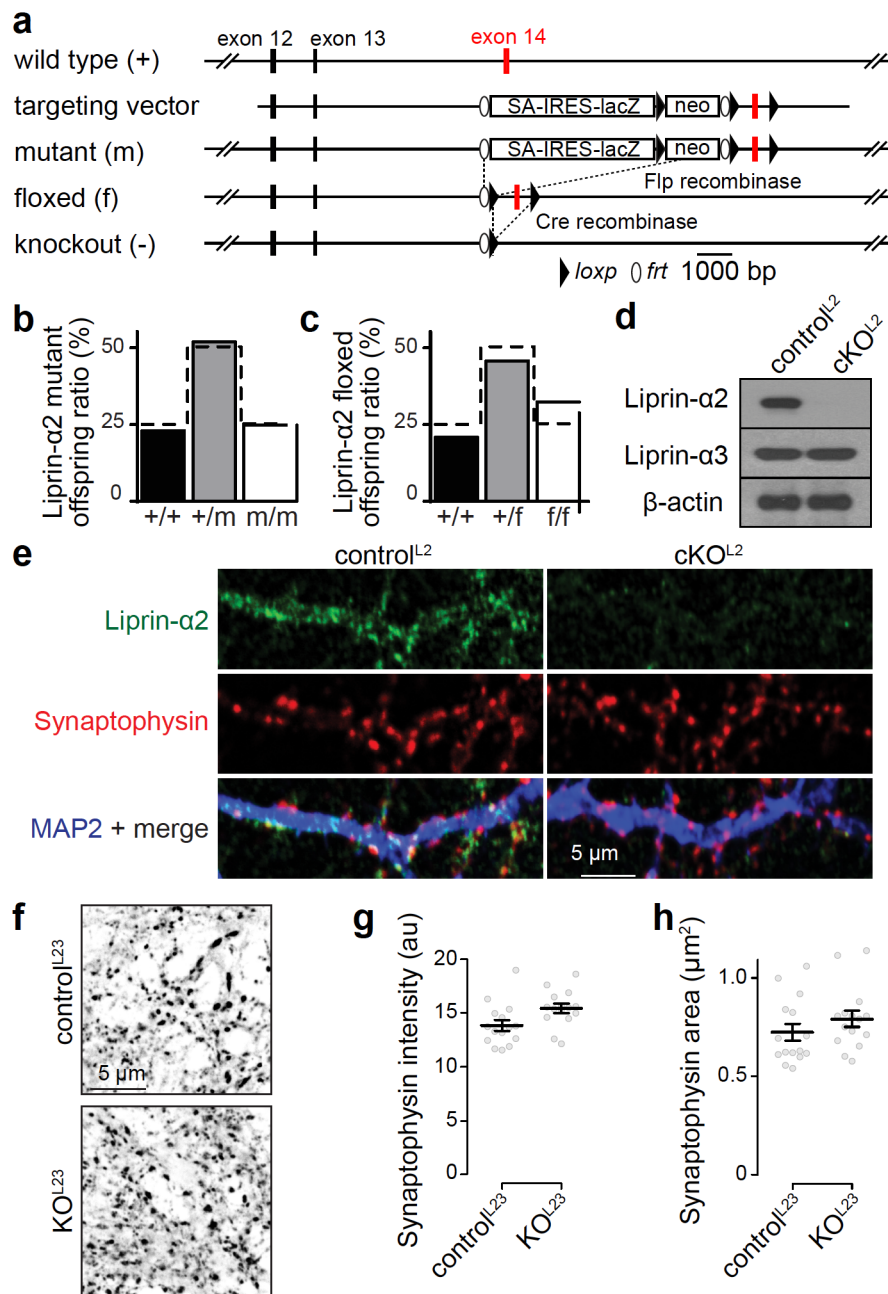

1095

1096 **Extended Data Figure 6. Generation of conditional Liprin-α2 knockout mice**

1097 **(a)** Diagram outlining the gene targeting experiment<sup>63</sup>. The targeting vector contained exon 14  
 1098 flanked by *loxP* sites, and splice-acceptor/*lacZ* and neomycin resistance cassettes flanked by *frt*  
 1099 sites. Homologous recombination in embryonic stem cells resulted in the Liprin-α2 mutant allele,  
 1100 and breeding to flp-transgenic mice<sup>64</sup> was used to produce the floxed allele. Cre recombinase  
 1101 can then be used to generate the knockout allele.

1102 **(b, c)** Survival ratios of the original mutant allele (b) and floxed (c) alleles in a total of ten litters  
1103 of mice per line.

1104 **(d, e)** Western blot (d) and immunostaining (d) of cultured neurons from Liprin- $\alpha$ 2 floxed mice  
1105 that were infected with lentiviruses that express Cre recombinase (to generate cKO<sup>L2</sup> neurons)  
1106 or with lentiviruses that express a recombination deficient truncation of Cre (to generate  
1107 control<sup>L2</sup> neurons). Liprin- $\alpha$ 2 was efficiently removed upon Cre recombination.

1108 **(f-h)** Example Synaptophysin images (f) and quantification of the average intensity (g) and size  
1109 (h) of Synaptophysin objects detected using automatic two-dimensional segmentation (size filter  
1110 of 0.5-5  $\mu\text{m}^2$  without considering the shape or orientation of the signal), N = 15 images/3  
1111 cultures per condition.

1112 Data are shown as mean  $\pm$  SEM, no significant differences were observed as tested by a t-test  
1113 (g) or a Mann-Whitney rank sum test (h).

1114

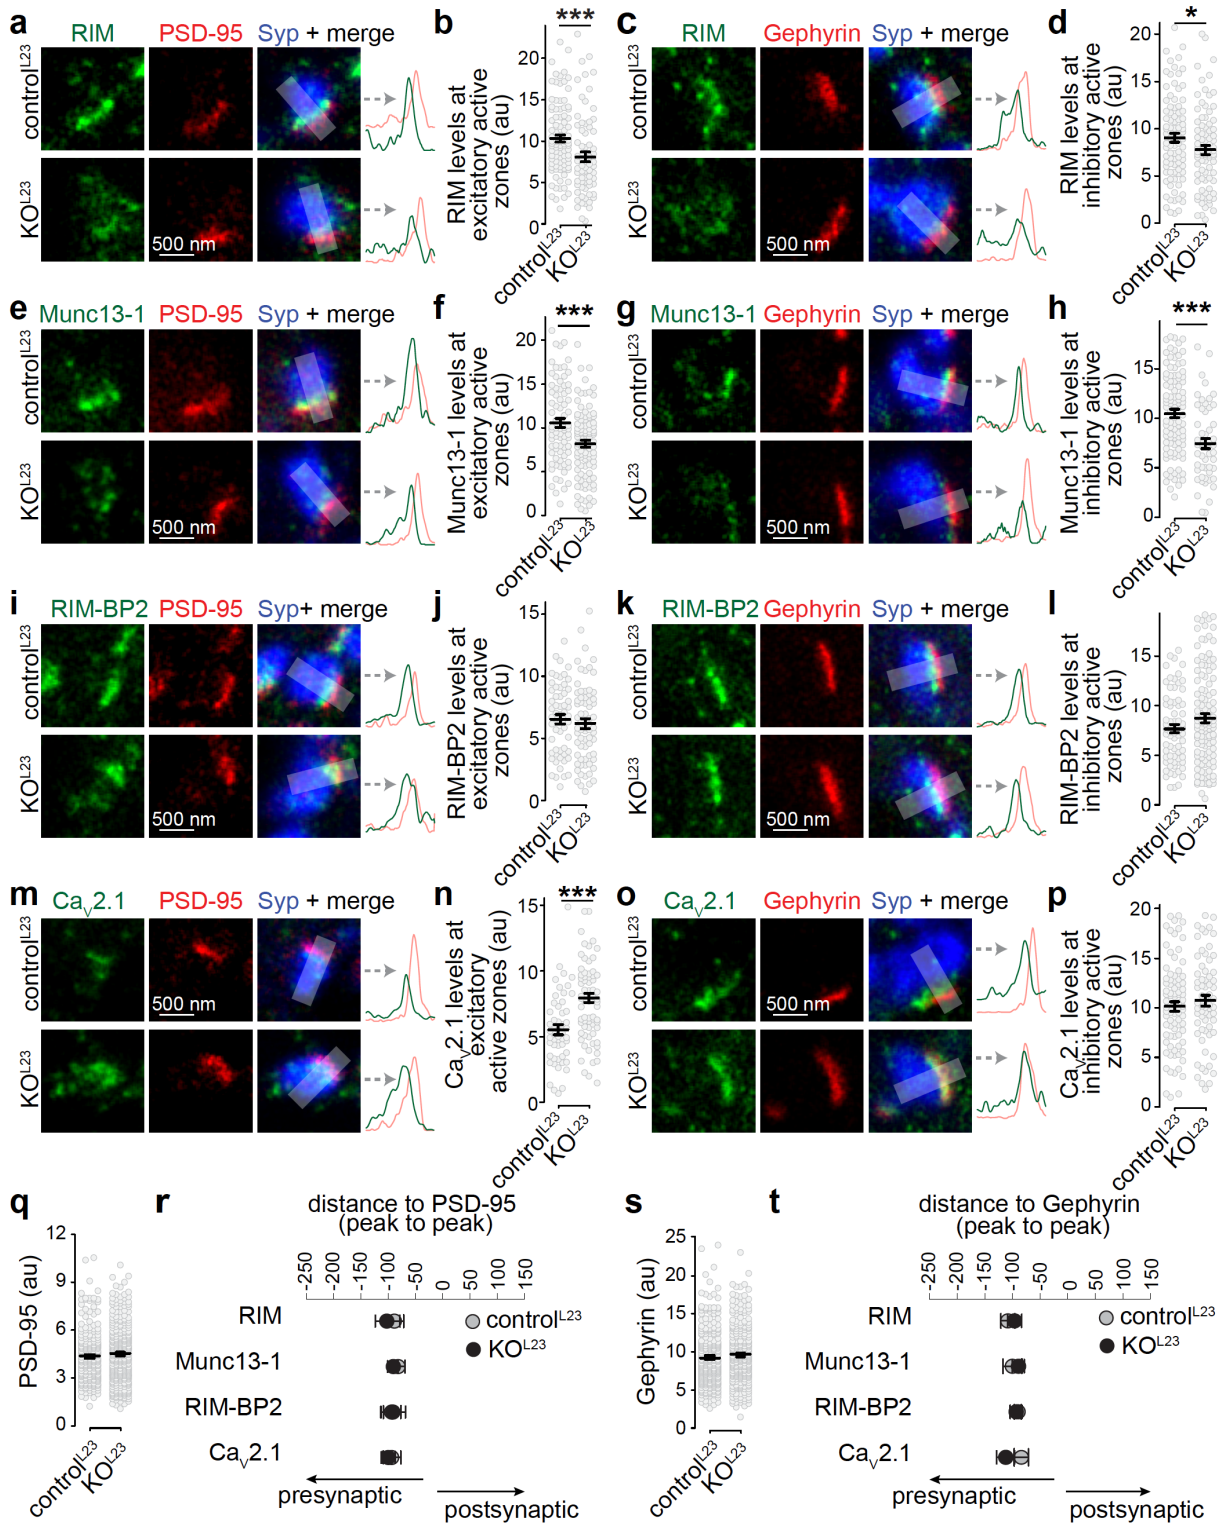

1115

1116

**Extended Data Figure 7. Altered active zone composition after ablation of Liprin-α2 and**

1117

**Liprin-α3**

1118 **(a-d)** Example STED images and line profiles (a, c) and quantification of peak intensities (b, d)  
1119 of RIM at Synaptophysin (Syp) positive excitatory side-view synapses identified via PSD-95  
1120 labeling (a, b) or inhibitory side-view synapses identified via Gephyrin labeling (c, d), b:  
1121 control<sup>L23</sup>: N = 96 synapses/3 independent cultures, KO<sup>L23</sup>: N = 69/3, d: N = 91/3, KO<sup>L23</sup>: N =  
1122 87/3.

1123 **(e-p)** Same as a-d, but for Munc13-1 (e-h), RIM-BP2 (i-l) and Cav2.1 (m-p). Munc13-1, f:  
1124 control<sup>L23</sup>: N = 79/3, KO<sup>L23</sup>: N = 99/3, h: control<sup>L23</sup>: N = 102/3, KO<sup>L23</sup>: N = 54/3; RIM-BP2, j:  
1125 control<sup>L23</sup>: N = 58/3, KO<sup>L23</sup>: N = 68/3, l: control<sup>L23</sup>: N = 73/3, KO<sup>L23</sup>: N = 116/3; Cav2.1, n:  
1126 control<sup>L23</sup>: N = 53/3, KO<sup>L23</sup>: N = 73/3, p: control<sup>L23</sup>: N = 87/3, KO<sup>L23</sup>: N = 66/3.

1127 **(q)** Quantification of the peak intensity of PSD-95 in all line scans analyzed, control<sup>L23</sup> N = 286/3,  
1128 KO<sup>L23</sup> = 309/3.

1129 **(r)** Quantification of the average distance of peaks of RIM, Munc13, RIM-BP2 and Cav2.1 to the  
1130 peak of PSD-95, N as in b, f, j and n.

1131 **(s)** Quantification of the peak intensity of Gephyrin in all line scans analyzed, control<sup>L23</sup> N =  
1132 353/3, KO<sup>L23</sup> = 323/3.

1133 **(t)** Quantification of the average distance of peaks of RIM, Munc13, RIM-BP2 and Cav2.1 to the  
1134 peak of Gephyrin, N as in d, h, l and p.

1135 Data are shown as mean  $\pm$  SEM, \* p < 0.05, \*\*\* p < 0.001 analyzed by Mann-Whitney rank-sum  
1136 tests (b, d, h, p, q-t) or t-tests (f, j, l, n).

1137

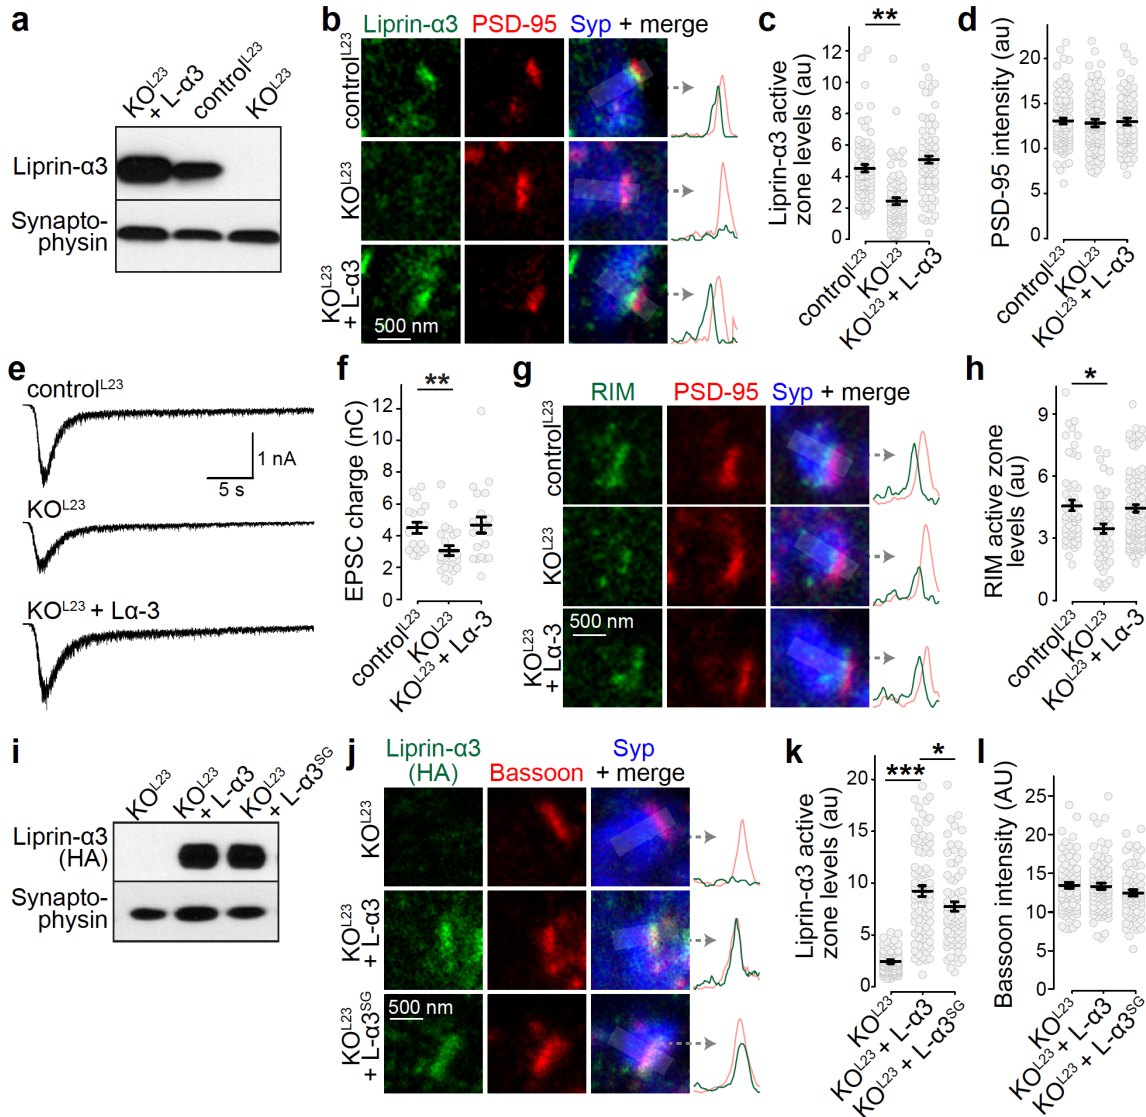

1138

1139 **Extended Data Figure 8. Rescue with Liprin-α3 reverses Liprin-α2/α3 knockout**

1140 **phenotypes**

1141 **(a)** Western blot of whole cell lysates of control<sup>L23</sup>, KO<sup>L23</sup> and KO<sup>L23</sup> rescued with Liprin-α3

1142 neuronal cultures.

1143 **(b-d)** Example STED images with intensity profiles (b) and quantification (c, d) of the peak

1144 intensities of Liprin-α3 and PSD-95 in side-view synapses. control<sup>L23</sup>: N = 83 synapses/3

1145 independent cultures, KO<sup>L23</sup>: N = 82/3, KO<sup>L23</sup> + L-α3: N = 77/3.

1146 **(e, f)** Example traces (e) and quantification (f) of EPSC charge in response to a local 10 s puff of

1147 500 mOsm sucrose to estimate the RRP, control<sup>L23</sup>: N = 18 cells/3 independent cultures, KO<sup>L23</sup>:  
1148 N = 24/3, KO<sup>L23</sup> + L- $\alpha$ 3: N = 21/3.

1149 **(g, h)** Example STED images with intensity profiles (g) and quantification (h) of the peak  
1150 intensity of RIM at the active zone of side-view synapses, control<sup>L23</sup>: N = 54/3, KO<sup>L23</sup>: N = 54/3,  
1151 KO<sup>L23</sup> + L- $\alpha$ 3: N = 97/3.

1152 **(i)** Western blot of whole cell lysates of KO<sup>L23</sup> and KO<sup>L23</sup> rescued with Liprin- $\alpha$ 3 or Liprin- $\alpha$ 3<sup>SG</sup>  
1153 neuronal cultures. An antibody against the HA tag was used for detection.

1154 **(j-l)** Representative STED images with intensity profiles (j) and quantification (k, l) of the peak  
1155 intensities of Liprin- $\alpha$ 3 and Bassoon in side-view synapses. control<sup>L23</sup>: KO<sup>L23</sup>: N = 81/3, KO<sup>L23</sup> +  
1156 L- $\alpha$ 3: N = 86/3, KO<sup>L23</sup> + L- $\alpha$ 3<sup>SG</sup>: N = 74/3.

1157 All data are shown as mean  $\pm$  SEM, \* p < 0.05, \*\* p < 0.01, \*\*\* p < 0.001 as analyzed by  
1158 Kruskal-Wallis tests (c, f, h, k) or one-way ANOVA tests (d, l) with posthoc (Holm and Tukey-  
1159 Kramer, respectively) testing against control<sup>L23</sup> (c, f, h) or KO<sup>L23</sup> and KO<sup>L23</sup> + L- $\alpha$ 3 (k).

1160

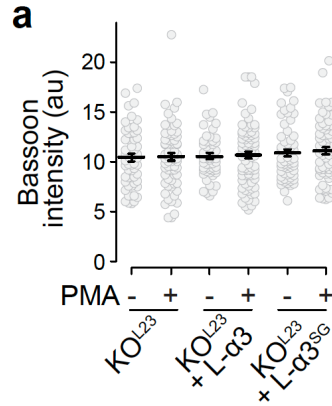

1161

1162 **Extended Data Figure 9. Bassoon levels after re-expression of Liprin-α3 and addition of**

1163 **PMA**

1164 **(A)** Quantification of the peak intensity of bassoon (data set from figure 7B). KO<sup>L23</sup>: N = 70

1165 synapses/3 independent cultures (- PMA) and 71/3 (+ PMA), KO<sup>L23</sup> + L-α3: N = 54/3 (- PMA)

1166 and 83/3 (+ PMA); KO<sup>L23</sup> + L-α3<sup>SG</sup>: N = 63/3 (- PMA) and 73/3 (+ PMA).

1167 Data are shown as mean ± SEM and analyzed using a Kruskal-Wallis test.

1168



1169 **Extended Data Movie 1. Liprin- $\alpha$ 3 forms droplets within minutes upon addition of PMA**  
1170 Time-lapse confocal movie showing formation of liquid condensates in HEK293T cells  
1171 transfected with mVenus-Liprin- $\alpha$ 3 upon PMA addition. Black boxes highlight two examples of  
1172 fusion reactions between condensates. Note that condensates are mobile, in agreement with  
1173 liquid dynamics, total time of experiment is 20 min compressed to 10 s.  
1174
